# Supplementary material
Source: PubMed Central journal article supplement (PMC4873412)
Supplement: NIHMS755847-supplement-3.pdf [file NIHMS755847-supplement-3.pdf]

Supplementary Table 2. Metabolomics of 786-O VHL-deficient and –restored cells upon cystine deprivation

| PARAM_GROUP_DESC                              | PLATFORM  | SUPER_PATHWAY          | SUB_PATHWAY                                      | Vec+Cys<br>18h | Vec+Cys<br>18h | Vec+Cys<br>18h | Vec+Cys<br>18h | Vec-Cys<br>18h | Vec-Cys<br>18h | Vec-Cys<br>18h | Vec-Cys<br>18h | VHL+Cys<br>18h | VHL+Cys<br>18h | VHL+Cys<br>18h | VHL+Cys<br>18h | VHL-Cys<br>18h | VHL-Cys<br>18h | VHL-Cys<br>18h | VHL-Cys<br>18h |
|-----------------------------------------------|-----------|------------------------|--------------------------------------------------|----------------|----------------|----------------|----------------|----------------|----------------|----------------|----------------|----------------|----------------|----------------|----------------|----------------|----------------|----------------|----------------|
| BIOCHEMICAL                                   |           |                        |                                                  |                |                |                |                |                |                |                |                |                |                |                |                |                |                |                |                |
| 1-arachidonoylglycerophosphoethanolamine*     | LC/MS Neg | Lipid                  | Lysolipid                                        | 1.45           | 1.24           | 2.97           | 1.67           | 1.71           | 0.81           | 0.99           | 1.1            | 1.11           | 2.96           | 1.83           | 1.33           | 1.06           | 1.4            | 1.15           | 1.01           |
| 1-methylnicotinamide                          | LC/MS Pos | Cofactors and vitamins | Nicotinate and nicotinamide metabolism           | 2.03           | 1.93           | 2.55           | 2.23           | 0.88           | 1.03           | 0.98           | 0.91           | 1.52           | 2.15           | 1.77           | 2.02           | 1.34           | 1.13           | 1.53           | 1.35           |
| 1-myristoylglycerophosphocholine              | LC/MS Pos | Lipid                  | Lysolipid                                        | 1.86           | 0.43           | 2.3            | 0.43           | 0.43           | 0.43           | 0.43           | 0.43           | 0.43           | 0.49           | 0.43           | 0.43           | 0.96           | 0.43           | 0.43           | 0.43           |
| 1-oleoylglycerophosphocholine                 | LC/MS Pos | Lipid                  | Lysolipid                                        | 2.26           | 0.08           | 3.21           | 0.85           | 1.1            | 0.08           | 0.54           | 0.08           | 1.01           | 2.06           | 1.74           | 0.08           | 1.2            | 0.08           | 0.08           | 0.08           |
| 1-oleoylglycerophosphoinositol*               | LC/MS Neg | Lipid                  | Lysolipid                                        | 0.71           | 0.38           | 1.39           | 0.38           | 0.38           | 0.63           | 0.62           | 0.38           | 0.91           | 0.86           | 0.75           | 0.38           | 0.41           | 0.68           | 0.94           | 0.59           |
| 1-palmitoylglycerophosphocholine              | LC/MS Pos | Lipid                  | Lysolipid                                        | 3.32           | 1              | 4.25           | 6.11           | 1.72           | 0.69           | 0.66           | 1.41           | 1.48           | 14.29          | 2.06           | 1.16           | 2              | 0.73           | 0.19           | 0.7            |
| 1-stearoylglycerophosphocholine               | LC/MS Pos | Lipid                  | Lysolipid                                        | 2.95           | 0.16           | 3.31           | 1.9            | 1.91           | 0.16           | 0.93           | 0.4            | 1.08           | 8.69           | 1.88           | 0.16           | 1.37           | 0.16           | 0.27           | 0.39           |
| 1-stearoylglycerophosphoethanolamine          | LC/MS Pos | Lipid                  | Lysolipid                                        | 1.94           | 0.39           | 1.45           | 0.39           | 0.39           | 0.39           | 0.39           | 0.39           | 0.39           | 0.39           | 0.39           | 0.39           | 0.76           | 0.39           | 0.39           | 0.39           |
| 1-stearoylglycerophosphoinositol              | LC/MS Neg | Lipid                  | Lysolipid                                        | 0.43           | 0.97           | 0.82           | 1.12           | 0.28           | 0.49           | 0.45           | 0.34           | 1.35           | 1.75           | 0.7            | 2              | 0.98           | 1.17           | 1.18           | 1.01           |
| 2-aminoadipate                                | GC/MS     | Amino acid             | Lysine metabolism                                | 0.21           | 0.21           | 0.21           | 0.21           | 0.21           | 0.21           | 0.21           | 0.21           | 0.21           | 0.21           | 0.21           | 0.21           | 0.21           | 0.21           | 0.21           | 0.21           |
| 2-aminobutyrate                               | GC/MS     | Amino acid             | Butanoate metabolism                             | 0.54           | 0.54           | 0.54           | 0.54           | 0.54           | 0.54           | 0.54           | 0.54           | 0.54           | 0.54           | 0.54           | 0.54           | 0.54           | 0.54           | 0.54           | 0.54           |
| 2-arachidonoylglycerophosphocholine*          | LC/MS Pos | Lipid                  | Lysolipid                                        | 3.34           | 0.51           | 3.33           | 2.16           | 1.52           | 0.06           | 0.62           | 0.39           | 1.26           | 6.11           | 2.35           | 0.67           | 3.45           | 0.06           | 0.25           | 0.2            |
| 2-arachidonoylglycerophosphoethanolamine*     | LC/MS Pos | Lipid                  | Lysolipid                                        | 5.2            | 1.74           | 6.15           | 5.61           | 1.97           | 0.58           | 1.3            | 2.24           | 1.97           | 16.62          | 2.73           | 1.41           | 3.2            | 0.69           | 0.29           | 0.63           |
| 2-docosahexaenoylglycerophosphoethanolamine*  | LC/MS Pos | Lipid                  | Lysolipid                                        | 14.17          | 0.67           | 16.28          | 2.55           | 4.01           | 1.14           | 2.43           | 0.84           | 5.83           | 9.82           | 8.85           | 0.68           | 11.82          | 0.14           | 0.85           | 0.14           |
| 2-docosapentaenoylglycerophosphoethanolamine* | LC/MS Pos | Lipid                  | Lysolipid                                        | 4.96           | 0.13           | 7.12           | 0.21           | 1.83           | 0.13           | 1              | 0.13           | 2.31           | 1.45           | 3.06           | 0.13           | 2.9            | 0.13           | 0.29           | 0.13           |
| 2-hydroxyglutarate                            | GC/MS     | Lipid                  | Fatty acid, dicarboxylate                        | 1.58           | 1.39           | 1.45           | 0.1            | 0.52           | 0.72           | 0.49           | 0.92           | 0.1            | 0.1            | 0.1            | 1.25           | 0.49           | 0.53           | 0.1            | 0.71           |
| 2-methylbutyrylcarnitine (C5)                 | LC/MS Pos | Amino acid             | Valine, leucine and isoleucine metabolism        | 1.21           | 1.04           | 1.41           | 1.18           | 0.25           | 0.57           | 0.53           | 0.25           | 0.81           | 0.25           | 0.57           | 0.25           | 0.58           | 0.25           | 0.25           | 0.63           |
| 2-myristoylglycerophosphocholine*             | LC/MS Pos | Lipid                  | Lysolipid                                        | 4.68           | 0.24           | 3.96           | 1.31           | 1.4            | 0.24           | 0.99           | 0.24           | 1.09           | 2.23           | 1.83           | 0.24           | 1.49           | 0.24           | 0.45           | 0.24           |
| 2-oleoylglycerophosphocholine*                | LC/MS Pos | Lipid                  | Lysolipid                                        | 8.66           | 0.08           | 9.19           | 1.32           | 4.15           | 0.08           | 1.21           | 0.19           | 3.41           | 4.28           | 4.24           | 0.08           | 5.23           | 0.08           | 0.29           | 0.08           |
| 2-oleoylglycerophosphoethanolamine*           | LC/MS Pos | Lipid                  | Lysolipid                                        | 4.45           | 0.35           | 4.17           | 0.96           | 1.75           | 0.12           | 0.69           | 0.14           | 1.5            | 3.07           | 2.01           | 0.12           | 1.95           | 0.12           | 0.15           | 0.12           |
| 2-oleoylglycerophosphoinositol*               | LC/MS Neg | Lipid                  | Lysolipid                                        | 0.54           | 0.54           | 0.54           | 0.54           | 0.54           | 0.54           | 0.54           | 0.54           | 0.54           | 0.54           | 0.54           | 0.54           | 0.54           | 0.54           | 0.54           | 0.54           |
| 2-palmitoleoylglycerophosphocholine*          | LC/MS Pos | Lipid                  | Lysolipid                                        | 3.18           | 0.18           | 2.6            | 0.18           | 0.86           | 0.18           | 0.46           | 0.18           | 0.58           | 1.37           | 1.54           | 0.18           | 1.47           | 0.18           | 0.18           | 0.18           |
| 2-palmitoylglycerophosphocholine*             | LC/MS Pos | Lipid                  | Lysolipid                                        | 2.61           | 0.04           | 3.49           | 1.78           | 1.21           | 0.04           | 0.52           | 0.04           | 1.1            | 2.85           | 1.16           | 0.04           | 1.66           | 0.04           | 0.1            | 0.04           |
| 2-palmitoylglycerophosphoethanolamine*        | LC/MS Pos | Lipid                  | Lysolipid                                        | 0.17           | 0.17           | 0.17           | 0.17           | 0.17           | 0.17           | 0.17           | 0.17           | 0.17           | 0.17           | 0.17           | 0.17           | 0.17           | 0.17           | 0.17           | 0.17           |
| 2-stearoylglycerophosphocholine*              | LC/MS Pos | Lipid                  | Lysolipid                                        | 1.22           | 0.47           | 1.72           | 1.89           | 0.47           | 0.47           | 0.47           | 0.47           | 0.47           | 2.81           | 1.19           | 0.47           | 0.9            | 0.47           | 0.47           | 0.47           |
| 3-(4-hydroxyphenyl)lactate                    | LC/MS Neg | Amino acid             | Phenylalanine & tyrosine metabolism              | 0.68           | 0.69           | 0.88           | 0.78           | 0.43           | 0.4            | 0.46           | 0.55           | 0.76           | 1.19           | 0.9            | 1.05           | 0.76           | 0.71           | 0.87           | 0.78           |
| 3-methyl-2-oxobutyrate                        | LC/MS Neg | Amino acid             | Valine, leucine and isoleucine metabolism        | 1.85           | 0.91           | 1.38           | 1.54           | 0.65           | 0.6            | 0.78           | 1.01           | 0.84           | 1.59           | 1.29           | 1.23           | 0.78           | 0.68           | 0.89           | 0.99           |
| 3-methyl-2-oxovalerate                        | LC/MS Neg | Amino acid             | Valine, leucine and isoleucine metabolism        | 1.23           | 0.98           | 1.59           | 1.3            | 0.62           | 0.62           | 0.64           | 0.78           | 0.92           | 1.4            | 1.21           | 1.09           | 0.96           | 0.85           | 1              | 0.84           |
| 3-phosphoglycerate                            | GC/MS     | Carbohydrate           | Glycolysis, gluconeogenesis, pyruvate metabolism | 1.97           | 1.77           | 0.83           | 1.01           | 0.57           | 0.56           | 0.71           | 0.62           | 0.57           | 0.73           | 0.91           | 0.75           | 0.68           | 0.99           | 0.95           | 0.44           |
| 4-methyl-2-oxopentanoate                      | LC/MS Neg | Amino acid             | Valine, leucine and isoleucine metabolism        | 1              | 1.01           | 1.36           | 1.06           | 0.54           | 0.63           | 0.52           | 0.73           | 0.77           | 1.2            | 1.05           | 1              | 0.86           | 0.76           | 0.92           | 0.87           |
| 5-aminovalerate                               | LC/MS Pos | Amino acid             | Urea cycle; arginine-, proline-, metabolism      | 2.72           | 2.97           | 1.9            | 1.49           | 0.58           | 0.51           | 1.23           | 0.53           | 1.53           | 2.55           | 2.43           | 1.95           | 1.09           | 0.91           | 1.38           | 1.34           |
| 5-methylthioadenosine (MTA)                   | LC/MS Pos | Amino acid             | Polyamine metabolism                             | 1.38           | 1.51           | 1.67           | 1.1            | 0.64           | 0.64           | 0.56           | 0.79           | 0.52           | 0.87           | 1              | 0.87           | 0.6            | 0.63           | 0.76           | 0.51           |
| 5-oxoproline                                  | LC/MS Neg | Amino acid             | Glutathione metabolism                           | 0.39           | 0.42           | 0.49           | 0.41           | 0.21           | 0.21           | 0.23           | 0.21           | 0.22           | 0.36           | 0.25           | 0.32           | 0.22           | 0.22           | 0.25           | 0.22           |
| acetyl CoA                                    | LC/MS Neg | Cofactors and vitamins | Pantothenate and CoA metabolism                  | 0.5            | 1.1            | 0.06           | 1.11           | 1.28           | 1.12           | 1.4            | 1.23           | 0.53           | 0.76           | 0.31           | 1.02           | 1.99           | 1.77           | 2.29           | 1.79           |
| acetylphosphate                               | GC/MS     | Energy                 | Oxidative phosphorylation                        | 1.03           | 1.47           | 1.2            | 1.67           | 0.5            | 0.67           | 0.6            | 0.54           | 0.63           | 1.09           | 0.78           | 1.08           | 0.59           | 0.76           | 0.93           | 0.63           |
| adenine                                       | GC/MS     | Nucleotide             | Purine metabolism; adenine containing            | 1.26           | 1              | 1.1            | 1.23           | 0.48           | 0.57           | 0.93           | 0.55           | 0.71           | 1              | 0.94           | 0.66           | 0.69           | 0.66           | 1.02           | 0.84           |
| adenosine                                     | LC/MS Pos | Nucleotide             | Purine metabolism; adenine containing            | 0.43           | 0.83           | 0.7            | 0.43           | 0.43           | 0.67           | 0.99           | 0.59           | 0.71           | 1.01           | 1.18           | 0.84           | 0.63           | 0.45           | 0.93           | 0.89           |
| adenosine 5'-monophosphate (AMP)              | LC/MS Pos | Nucleotide             | Purine metabolism; adenine containing            | 1.02           | 0.91           | 1.09           | 0.78           | 0.42           | 0.55           | 0.54           | 0.51           | 0.95           | 1.39           | 1.04           | 1.45           | 0.58           | 0.46           | 0.66           | 0.48           |
| alanine                                       | GC/MS     | Amino acid             | Alanine and aspartate metabolism                 | 1.22           | 1.01           | 1.29           | 0.98           | 0.41           | 0.61           | 0.57           | 0.43           | 0.74           | 0.96           | 0.8            | 0.83           | 0.81           | 0.85           | 0.88           | 0.72           |
| allantoin                                     | GC/MS     | Nucleotide             | Purine metabolism, urate metabolism              | 0.33           | 0.33           | 0.33           | 0.33           | 0.33           | 0.33           | 0.33           | 0.33           | 0.33           | 0.33           | 0.33           | 0.33           | 0.33           | 0.33           | 0.33           | 0.33           |
| alpha-ketoglutarate                           | GC/MS     | Energy                 | Krebs cycle                                      | 2.76           | 4.48           | 3.31           | 2.77           | 0.9            | 1.25           | 0.75           | 0.71           | 0.95           | 1.47           | 1.44           | 1.14           | 0.39           | 0.79           | 0.88           | 0.74           |
| arabitol                                      | GC/MS     | Carbohydrate           | Nucleotide sugars, pentose metabolism            | 0.25           | 0.93           | 0.25           | 0.25           | 0.25           | 0.25           | 0.25           | 0.25           | 0.25           | 0.25           | 0.25           | 0.25           | 0.25           | 0.29           | 0.25           | 0.25           |
| arachidonate (20:4n6)                         | LC/MS Neg | Lipid                  | Long chain fatty acid                            | 1.1            | 1.41           | 1.36           | 1.42           | 0.9            | 1.31           | 1.05           | 0.88           | 0.58           | 1.11           | 0.83           | 1.42           | 0.47           | 0.85           | 0.86           | 0.73           |
| arginine                                      | LC/MS Pos | Amino acid             | Urea cycle; arginine-, proline-, metabolism      | 1.76           | 1.97           | 2.27           | 2.14           | 0.74           | 0.88           | 0.9            | 0.86           | 1.11           | 1.74           | 1.29           | 1.54           | 0.93           | 0.81           | 0.98           | 0.95           |
| asparagine                                    | GC/MS     | Amino acid             | Alanine and aspartate metabolism                 | 0.2            | 0.2            | 0.2            | 0.37           | 0.65           | 0.75           | 0.67           | 0.96           | 0.2            | 0.96           | 1              | 0.67           | 1              | 1.32           | 1.22           | 1.03           |
| aspartate                                     | GC/MS     | Amino acid             | Alanine and aspartate metabolism                 | 1.14           | 1.41           | 1.34           | 1.21           | 0.79           | 0.76           | 0.64           | 0.73           | 0.81           | 1.35           | 0.9            | 1              | 0.99           | 0.97           | 1.18           | 1.03           |
| azelate (nonanedioate)                        | LC/MS Neg | Lipid                  | Fatty acid, dicarboxylate                        | 2.61           | 1.82           | 2.23           | 2.77           | 0.72           | 0.81           | 1.01           | 0.94           | 1.47           | 1.99           | 1.35           | 1.94           | 0.82           | 0.74           | 0.92           | 1.15           |
| beta-alanine                                  | GC/MS     | Amino acid             | Alanine and aspartate metabolism                 | 3.23           | 1.85           | 2.82           | 4.22           | 0.3            | 0.86           | 0.56           | 0.37           | 1.38           | 3.03           | 1.26           | 2.38           | 0.72           | 0.58           | 0.68           | 0.61           |
| betaine                                       | LC/MS Pos | Amino acid             | Glycine, serine and threonine metabolism         | 0.71           | 0.98           | 0.75           | 0.08           | 0.08           | 0.08           | 0.08           | 0.21           | 0.67           | 1.12           | 0.72           | 0.92           | 0.51           | 0.49           | 0.43           | 0.41           |
| butyrylcarnitine                              | LC/MS Pos | Lipid                  | Fatty acid metabolism (also BCAA metabolism)     | 0.75           | 0.65           | 1.06           | 0.64           | 0.14           | 0.2            | 0.18           | 0.18           | 0.42           | 0.56           | 0.4            | 0.47           | 0.09           | 0.11           | 0.13           | 0.12           |
| carnitine                                     | LC/MS Pos | Lipid                  | Carnitine metabolism                             | 0.74           | 0.78           | 0.95           | 0.68           | 0.29           | 0.28           | 0.27           | 0.26           | 0.35           | 0.61           | 0.4            | 0.56           | 0.25           | 0.25           | 0.32           | 0.3            |
| cholesterol                                   | GC/MS     | Lipid                  | Sterol/Steroid                                   | 1              | 1.69           | 1.61           | 1.71           | 0.58           | 0.85           | 0.6            | 0.52           | 0.73           | 1.11           | 1.05           | 1.44           | 0.61           | 0.88           | 0.83           | 0.95           |
| choline phosphate                             | LC/MS Pos | Lipid                  | Glycerolipid metabolism                          | 1.6            | 1.82           | 2.15           | 1.94           | 0.58           | 0.71           | 0.68           | 0.59           | 0.88           | 1.26           | 0.91           | 1.08           | 0.63           | 0.52           | 0.69           | 0.63           |
| citrate                                       | GC/MS     | Energy                 | Krebs cycle                                      | 1.15           | 1              | 1.39           | 1.12           | 0.41           | 0.38           | 0.25           | 0.47           | 0.9            | 1.36           | 0.87           | 1.23           | 0.55           | 0.42           | 0.51           | 0.46           |
| coenzyme A                                    | LC/MS Neg | Cofactors and vitamins | Pantothenate and CoA metabolism                  | 1.29           | 1.38           | 1.62           | 1.31           | 0.14           | 0.24           | 0.14           | 0.18           | 0.94           | 1.45           | 1.1            | 1.23           | 0.14           | 0.22           | 0.2            | 0.27           |
| creatine                                      | LC/MS Pos | Amino acid             | Creatine metabolism                              | 1.49           | 1.45           | 1.87           | 1.59           | 0.58           | 0.72           | 0.67           | 0.58           | 0.93           | 1.32           | 1.05           | 1.23           | 0.7            | 0.62           | 0.83           | 0.7            |
| creatine phosphate                            | LC/MS Neg | Amino acid             | Creatine metabolism                              | 0.08           | 0.08           | 0.08           | 0.08           | 0.08           | 0.08           | 0.08           | 0.08           | 0.08           | 0.15           | 0.1            | 0.13           | 0.08           | 0.08           | 0.08           | 0.08           |
| creatinine                                    |           |                        |                                                  |                |                |                |                |                |                |                |                |                |                |                |                |                |                |                |                |

|                                                                            |           |                        |                                                              |      |      |      |      |      |      |      |      |      |      |      |      |       |      |       |      |
|----------------------------------------------------------------------------|-----------|------------------------|--------------------------------------------------------------|------|------|------|------|------|------|------|------|------|------|------|------|-------|------|-------|------|
| glutamine                                                                  | LC/MS Pos | Amino acid             | Glutamate metabolism                                         | 1.06 | 1.17 | 1.34 | 1.38 | 0.82 | 0.98 | 0.95 | 0.82 | 0.98 | 1.4  | 0.96 | 1.17 | 1.36  | 1.04 | 1.42  | 1.41 |
| glutathione, oxidized (GSSG)                                               | LC/MS Pos | Amino acid             | Glutathione metabolism                                       | 2.19 | 2.09 | 2.68 | 2.31 | 0.01 | 0.02 | 0.01 | 0.01 | 1.36 | 2.46 | 1.79 | 1.92 | 0.01  | 0.01 | 0.01  | 0.01 |
| glutathione, reduced (GSH)                                                 | LC/MS Pos | Amino acid             | Glutathione metabolism                                       | 2.71 | 2.51 | 3.08 | 2.76 | 0    | 0.01 | 0    | 0    | 1.74 | 2.43 | 1.82 | 2.46 | 0.01  | 0.01 | 0.01  | 0.01 |
| glycerol 2-phosphate                                                       | GC/MS     | Xenobiotics            | Chemical                                                     | 1.03 | 2.47 | 2.74 | 1.94 | 1.19 | 1.27 | 0.94 | 0.79 | 0.34 | 0.76 | 0.3  | 0.3  | 0.37  | 0.3  | 1.01  | 0.3  |
| glycerol 3-phosphate (G3P)                                                 | GC/MS     | Lipid                  | Glycerolipid metabolism                                      | 1.64 | 1.9  | 2.3  | 2.11 | 0.93 | 0.82 | 1.04 | 0.96 | 0.4  | 0.44 | 0.46 | 0.41 | 0.33  | 0.33 | 0.54  | 0.26 |
| glycerophosphorylcholine (GPC)                                             | LC/MS Pos | Lipid                  | Glycerolipid metabolism                                      | 3.02 | 3.13 | 3.93 | 3.65 | 1.61 | 1.79 | 1.81 | 1.66 | 0.38 | 0.59 | 0.42 | 0.52 | 0.35  | 0.32 | 0.38  | 0.35 |
| glycine                                                                    | GC/MS     | Amino acid             | Glycine, serine and threonine metabolism                     | 0.48 | 0.49 | 0.61 | 0.51 | 0.39 | 0.38 | 0.39 | 0.39 | 0.49 | 0.76 | 0.61 | 0.64 | 0.61  | 0.62 | 0.76  | 0.65 |
| guanosine 5'-triphosphate                                                  | LC/MS Neg | Nucleotide             | Purine metabolism, guanine containing                        | 2.07 | 2.03 | 2.18 | 2    | 0.69 | 1    | 0.95 | 0.9  | 1.24 | 1.9  | 1.21 | 1.54 | 1.04  | 0.88 | 1.07  | 1.11 |
| hippurate                                                                  | LC/MS Neg | Xenobiotics            | Benzoate metabolism                                          | 0.76 | 0.76 | 0.76 | 0.76 | 0.76 | 0.76 | 0.76 | 0.76 | 0.76 | 0.76 | 0.76 | 0.76 | 0.76  | 0.76 | 0.76  | 0.76 |
| histidine                                                                  | LC/MS Neg | Amino acid             | Histidine metabolism                                         | 0.88 | 0.92 | 1    | 0.86 | 0.74 | 0.68 | 0.78 | 0.63 | 0.88 | 0.92 | 1.15 | 0.88 | 1.09  | 0.89 | 1.27  | 0.9  |
| homocystine                                                                | LC/MS Pos | Amino acid             | Cysteine, methionine, SAM, taurine metabolism                | 1.78 | 2.34 | 2.67 | 2.17 | 1.02 | 1.26 | 1.26 | 1.1  | 1.29 | 2.28 | 1.42 | 1.88 | 1.17  | 0.89 | 1.33  | 0.82 |
| hypotaurine                                                                | GC/MS     | Amino acid             | Cysteine, methionine, SAM, taurine metabolism                | 1.1  | 0.67 | 1.01 | 0.82 | 0.07 | 0.24 | 0.07 | 0.19 | 0.26 | 0.35 | 0.28 | 0.53 | 0.2   | 0.25 | 0.07  | 0.27 |
| inosine                                                                    | LC/MS Neg | Nucleotide             | Purine metabolism, (hypo)xanthine/inosine containing         | 0.25 | 0.25 | 0.25 | 0.25 | 0.25 | 0.43 | 0.25 | 0.25 | 0.25 | 0.25 | 0.25 | 0.25 | 0.25  | 0.25 | 0.47  | 0.75 |
| inositol 1-phosphate (I1P)                                                 | GC/MS     | Lipid                  | Inositol metabolism                                          | 0.87 | 1.09 | 0.52 | 0.67 | 0.56 | 0.6  | 0.59 | 0.39 | 0.98 | 1.38 | 1.01 | 0.61 | 0.6   | 0.75 | 0.71  | 0.61 |
| Isobar: fructose 1,6-diphosphate, glucose 1,6-diphosphate, myo-inositol 1, | LC/MS Neg | Carbohydrate           | Glycolysis, gluconeogenesis, pyruvate metabolism             | 3.02 | 2.96 | 3.52 | 2.96 | 0.83 | 1.01 | 0.99 | 0.96 | 1.15 | 2.01 | 1.34 | 1.47 | 0.77  | 0.72 | 0.71  | 0.71 |
| isobutyrylcarnitine                                                        | LC/MS Pos | Amino acid             | Valine, leucine and isoleucine metabolism                    | 0.33 | 0.33 | 0.33 | 0.33 | 0.33 | 0.33 | 0.33 | 0.33 | 0.33 | 0.33 | 0.33 | 0.33 | 0.33  | 0.33 | 0.33  | 0.33 |
| isoleucine                                                                 | LC/MS Pos | Amino acid             | Valine, leucine and isoleucine metabolism                    | 0.88 | 0.84 | 0.87 | 0.94 | 0.47 | 0.62 | 0.64 | 0.65 | 0.79 | 1.25 | 0.81 | 1.12 | 0.86  | 0.72 | 0.91  | 0.92 |
| isovalerylcarnitine                                                        | LC/MS Pos | Amino acid             | Valine, leucine and isoleucine metabolism                    | 0.24 | 1    | 0.24 | 0.24 | 0.24 | 0.24 | 0.24 | 0.24 | 0.24 | 0.24 | 0.24 | 0.24 | 0.24  | 0.24 | 0.24  | 1.27 |
| kyurenine                                                                  | LC/MS Pos | Amino acid             | Tryptophan metabolism                                        | 1.12 | 0.34 | 1.71 | 0.34 | 0.34 | 0.34 | 1.29 | 0.34 | 0.85 | 0.34 | 1.07 | 1.56 | 0.82  | 0.72 | 0.94  | 0.55 |
| lactate                                                                    | GC/MS     | Carbohydrate           | Glycolysis, gluconeogenesis, pyruvate metabolism             | 0.94 | 0.93 | 1.39 | 1.03 | 0.44 | 0.39 | 0.53 | 0.45 | 0.73 | 0.94 | 0.82 | 0.98 | 0.49  | 0.47 | 0.62  | 0.53 |
| lathosterol                                                                | GC/MS     | Lipid                  | Sterol/Steroid                                               | 0.66 | 0.2  | 0.2  | 0.2  | 0.57 | 0.2  | 0.2  | 0.2  | 1.08 | 0.2  | 0.2  | 0.42 | 0.2   | 0.2  | 0.2   | 0.2  |
| leucine                                                                    | LC/MS Pos | Amino acid             | Valine, leucine and isoleucine metabolism                    | 0.88 | 0.84 | 0.87 | 0.92 | 0.47 | 0.62 | 0.61 | 0.65 | 0.76 | 1.22 | 0.8  | 1.12 | 0.79  | 0.86 | 0.95  | 0.92 |
| lysine                                                                     | GC/MS     | Amino acid             | Lysine metabolism                                            | 0.63 | 0.8  | 0.56 | 0.85 | 0.51 | 0.92 | 0.67 | 0.72 | 0.39 | 0.68 | 0.7  | 0.63 | 0.49  | 0.67 | 0.49  | 0.66 |
| malate                                                                     | GC/MS     | Energy                 | Krebs cycle                                                  | 1.8  | 2.27 | 2.57 | 2.09 | 0.59 | 0.62 | 0.57 | 0.77 | 0.99 | 1.63 | 1.03 | 1.35 | 0.64  | 0.63 | 0.79  | 0.65 |
| methionine                                                                 | LC/MS Pos | Amino acid             | Cysteine, methionine, SAM, taurine metabolism                | 1.21 | 0.99 | 1.23 | 1.16 | 0.64 | 0.72 | 0.75 | 0.77 | 0.92 | 1.32 | 0.93 | 1.17 | 0.83  | 0.83 | 1     | 0.89 |
| myo-inositol                                                               | GC/MS     | Lipid                  | Inositol metabolism                                          | 0.65 | 0.62 | 0.81 | 0.64 | 0.27 | 0.25 | 0.25 | 0.27 | 0.25 | 0.39 | 0.31 | 0.32 | 0.22  | 0.19 | 0.23  | 0.19 |
| N-acetyl-aspartyl-glutamate (NAAG)                                         | LC/MS Pos | Amino acid             | Glutamate metabolism                                         | 0.75 | 0.65 | 0.86 | 0.88 | 0.34 | 0.36 | 0.35 | 0.53 | 1    | 1.6  | 1.17 | 1.31 | 0.74  | 0.56 | 0.96  | 0.78 |
| N-acetylaniline                                                            | LC/MS Neg | Amino acid             | Alanine and aspartate metabolism                             | 0.22 | 1.04 | 1.29 | 0.96 | 0.36 | 0.54 | 0.22 | 0.22 | 0.72 | 0.22 | 0.81 | 0.7  | 0.22  | 0.22 | 0.22  | 0.22 |
| N-acetylaspartate (NAA)                                                    | GC/MS     | Amino acid             | Alanine and aspartate metabolism                             | 1.15 | 1.49 | 1.25 | 1.17 | 0.5  | 0.42 | 0.45 | 0.28 | 0.97 | 1.41 | 1.32 | 1.44 | 0.65  | 0.84 | 0.99  | 0.83 |
| N-acetylglutamate                                                          | LC/MS Neg | Amino acid             | Glutamate metabolism                                         | 1.65 | 2.15 | 2.64 | 2.08 | 0.81 | 0.81 | 0.97 | 0.96 | 1.56 | 2.16 | 1.66 | 2.34 | 1.04  | 0.81 | 1.19  | 1.2  |
| N-acetylglutamine                                                          | LC/MS Pos | Amino acid             | Glutamate metabolism                                         | 0.29 | 0.29 | 1.13 | 0.29 | 0.29 | 0.29 | 0.29 | 0.29 | 0.75 | 0.79 | 0.87 | 0.29 | 0.29  | 0.29 | 0.29  | 0.29 |
| N-acetylmethionine                                                         | LC/MS Neg | Amino acid             | Cysteine, methionine, SAM, taurine metabolism                | 1.34 | 1.34 | 2.03 | 1.58 | 0.3  | 0.31 | 0.33 | 0.32 | 0.94 | 1.54 | 0.88 | 0.89 | 0.3   | 0.28 | 0.49  | 0.37 |
| N-acetylneuraminate                                                        | GC/MS     | Carbohydrate           | Aminosugars metabolism                                       | 0.33 | 0.33 | 0.96 | 0.58 | 0.33 | 0.33 | 0.33 | 0.33 | 0.92 | 1.89 | 0.38 | 0.33 | 0.33  | 0.74 | 0.51  | 0.42 |
| N-acetyls erine                                                            | GC/MS     | Amino acid             | Glycine, serine and threonine metabolism                     | 1.54 | 0.11 | 1.42 | 0.69 | 0.31 | 0.33 | 0.11 | 0.48 | 0.68 | 1.71 | 1.32 | 0.8  | 0.4   | 0.33 | 0.45  | 0.26 |
| N-acetylthreonine                                                          | LC/MS Neg | Amino acid             | Glycine, serine and threonine metabolism                     | 1.18 | 1.2  | 1.02 | 1.22 | 0.22 | 0.24 | 0.22 | 0.22 | 0.53 | 1.07 | 0.64 | 0.86 | 0.29  | 0.28 | 0.41  | 0.44 |
| N-carbamoylaspartate                                                       | LC/MS Pos | Amino acid             | Alanine and aspartate metabolism                             | 1.24 | 1.2  | 2.61 | 1.61 | 0.46 | 0.46 | 0.46 | 0.46 | 0.74 | 0.82 | 0.81 | 1.52 | 0.46  | 0.69 | 0.46  | 0.51 |
| nicotinamide                                                               | LC/MS Pos | Cofactors and vitamins | Nicotinate and nicotinamide metabolism                       | 0.94 | 1.47 | 1.9  | 0.64 | 0.69 | 0.8  | 1.14 | 0.62 | 0.91 | 1.26 | 1.24 | 1.38 | 0.72  | 0.81 | 1     | 1.01 |
| nicotinamide adenine dinucleotide (NAD+)                                   | LC/MS Pos | Cofactors and vitamins | Nicotinate and nicotinamide metabolism                       | 0.88 | 0.95 | 1.2  | 0.96 | 0.38 | 0.44 | 0.45 | 0.42 | 0.84 | 1.31 | 1.03 | 1.25 | 0.69  | 0.67 | 0.82  | 0.72 |
| nicotinamide adenine dinucleotide reduced (NADH)                           | LC/MS Neg | Cofactors and vitamins | Nicotinate and nicotinamide metabolism                       | 1.89 | 1.86 | 1.89 | 2.17 | 0.43 | 1.03 | 0.77 | 0.97 | 1.46 | 5.18 | 1.9  | 2.84 | 0.93  | 1.59 | 1.07  | 1.98 |
| ophthalmate                                                                | LC/MS Neg | Amino acid             | Glutathione metabolism                                       | 0.35 | 0.35 | 0.35 | 0.35 | 0.35 | 0.35 | 0.35 | 0.35 | 0.35 | 0.35 | 0.35 | 0.35 | 0.35  | 0.35 | 0.35  | 0.35 |
| ornithine                                                                  | GC/MS     | Amino acid             | Urea cycle; arginine-, proline-, metabolism                  | 1.06 | 2.01 | 0.96 | 1.09 | 0.71 | 0.82 | 0.79 | 0.54 | 1.94 | 2.83 | 1.76 | 2.02 | 1.72  | 1.79 | 2.09  | 2.02 |
| p-toluic acid                                                              | GC/MS     | Amino acid             | Phenylalanine & tyrosine metabolism                          | 0.49 | 0.49 | 0.49 | 0.49 | 0.81 | 0.49 | 0.79 | 0.49 | 0.49 | 0.49 | 0.49 | 0.49 | 0.49  | 0.85 | 0.49  | 0.49 |
| palmitoyl sphingomyelin                                                    | GC/MS     | Lipid                  | Sphingolipid                                                 | 6.93 | 1.07 | 1.3  | 0.96 | 0.54 | 0.52 | 0.54 | 0.48 | 0.82 | 1.02 | 0.85 | 1.12 | 0.6   | 0.69 | 0.62  | 0.72 |
| pantothenate                                                               | LC/MS Pos | Cofactors and vitamins | Pantothenate and CoA metabolism                              | 0.29 | 5.87 | 7    | 6.92 | 1.72 | 2.18 | 2.27 | 2.29 | 4    | 6.31 | 4.4  | 5.96 | 2.84  | 2.82 | 3.36  | 3.04 |
| penicillin G                                                               | LC/MS Pos | Xenobiotics            | Drug                                                         | 1.07 | 0.99 | 1.12 | 1.14 | 1.34 | 1.44 | 1.54 | 1.72 | 0.82 | 0.95 | 0.74 | 1.09 | 1.44  | 1.23 | 1.44  | 1.46 |
| phenol red                                                                 | LC/MS Neg | Xenobiotics            | Chemical                                                     | 0.99 | 1.01 | 0.99 | 1.01 | 0.99 | 1.01 | 0.99 | 1.01 | 0.99 | 1.01 | 0.99 | 1.01 | 0.99  | 1.01 | 0.99  | 1.01 |
| phenylacetylglucine                                                        | LC/MS Neg | Amino acid             | Phenylalanine & tyrosine metabolism                          | 0.72 | 0.65 | 0.89 | 0.69 | 0.24 | 0.4  | 0.36 | 0.29 | 0.52 | 1    | 0.46 | 0.41 | 0.27  | 0.32 | 0.42  | 0.32 |
| phenylalanine                                                              | LC/MS Pos | Amino acid             | Phenylalanine & tyrosine metabolism                          | 0.8  | 0.77 | 0.82 | 0.88 | 0.39 | 0.59 | 0.54 | 0.64 | 0.79 | 1.18 | 0.76 | 1.17 | 0.76  | 0.77 | 0.8   | 0.86 |
| phosphate                                                                  | GC/MS     | Energy                 | Oxidative phosphorylation                                    | 1.73 | 1.92 | 2.06 | 1.88 | 1.11 | 0.99 | 1.05 | 1.22 | 1.05 | 1.76 | 1.52 | 1.49 | 0.86  | 1.1  | 1.14  | 0.99 |
| phosphoethanolamine                                                        | GC/MS     | Lipid                  | Glycerolipid metabolism                                      | 0.3  | 0.58 | 0.3  | 0.3  | 0.3  | 0.3  | 0.3  | 0.3  | 0.3  | 0.3  | 0.3  | 0.3  | 0.3   | 0.3  | 0.3   | 0.3  |
| pro-hydroxy-pro                                                            | LC/MS Pos | Peptide                | Dipeptide                                                    | 0.16 | 0.16 | 0.16 | 0.16 | 0.16 | 0.16 | 0.16 | 0.16 | 0.16 | 0.16 | 0.16 | 0.16 | 0.16  | 0.16 | 0.16  | 0.16 |
| proline                                                                    | LC/MS Pos | Amino acid             | Urea cycle; arginine-, proline-, metabolism                  | 1.69 | 1.91 | 2.18 | 1.99 | 0.85 | 1.01 | 0.99 | 0.9  | 1.11 | 1.68 | 1.3  | 1.59 | 0.99  | 0.91 | 1.24  | 1.06 |
| propionylcarnitine                                                         | LC/MS Pos | Lipid                  | Fatty acid metabolism (also BCAA metabolism)                 | 0.96 | 0.89 | 1.04 | 1.11 | 0.28 | 0.31 | 0.48 | 0.44 | 0.33 | 0.46 | 0.4  | 0.51 | 0.24  | 0.26 | 0.25  | 0.26 |
| pseudouridine                                                              | LC/MS Neg | Nucleotide             | Pyrimidine metabolism, uracil containing                     | 0.35 | 0.35 | 0.35 | 0.35 | 0.35 | 0.35 | 0.35 | 0.35 | 0.35 | 0.35 | 0.35 | 0.35 | 0.35  | 0.35 | 0.35  | 0.35 |
| putrescine                                                                 | GC/MS     | Amino acid             | Polyamine metabolism                                         | 1.16 | 1.38 | 0.98 | 0.91 | 0.23 | 0.43 | 0.42 | 0.37 | 1.45 | 2.75 | 2.01 | 2.23 | 0.98  | 1.4  | 1.29  | 1.02 |
| pyridoxine (Vitamin B6)                                                    | LC/MS Neg | Cofactors and vitamins | Vitamin B6 metabolism                                        | 1.16 | 1.1  | 0.8  | 0.83 | 0.46 | 0.42 | 0.46 | 0.45 | 0.69 | 0.76 | 0.78 | 0.8  | 0.63  | 0.44 | 0.86  | 0.55 |
| pyroglutamine*                                                             | LC/MS Pos | Amino acid             | Glutamate metabolism                                         | 3.86 | 3.56 | 4.4  | 2.81 | 1.33 | 1.65 | 1.44 | 1.15 | 2.11 | 2.43 | 2.4  | 2.77 | 1.33  | 1.21 | 2.05  | 1.73 |
| pyrophosphate (PPi)                                                        | GC/MS     | Energy                 | Oxidative phosphorylation                                    | 2.07 | 1.87 | 0.97 | 1.29 | 0.07 | 0.29 | 0.57 | 0.29 | 1.01 | 1.2  | 0.45 | 0.92 | 0.47  | 0.57 | 0.67  | 0.47 |
| ribitol                                                                    | GC/MS     | Carbohydrate           | Nucleotide sugars, pentose metabolism                        | 1.48 | 2.02 | 2.62 | 1.72 | 0.88 | 0.86 | 0.35 | 1.08 | 1.14 | 2.46 | 1.77 | 2.05 | 1.09  | 1.74 | 1.31  | 1.38 |
| S-adenosylhomocysteine (SAH)                                               | LC/MS Neg | Amino acid             | Cysteine, methionine, SAM, taurine metabolism                | 2.68 | 2.22 | 3.44 | 3.18 | 0.4  | 0.67 | 0.51 | 0.4  | 1.84 | 4.01 | 2.19 | 3.48 | 0.69  | 0.97 | 0.95  | 0.95 |
| S-lactoylglutathione                                                       | LC/MS Neg | Amino acid             | Glutathione metabolism                                       | 1.35 | 1.9  | 1.36 | 2.08 | 0.13 | 0.13 | 0.13 | 0.13 | 0.94 | 1.08 | 0.65 | 1.12 | 0.13  | 0.13 | 0.13  | 0.13 |
| scyllo-inositol                                                            | GC/MS     | Lipid                  | Inositol metabolism                                          | 0.26 | 0.72 | 0.24 | 0.05 | 0.05 | 0.1  | 0.05 | 0.05 | 0.05 | 0.05 | 0.05 | 0.05 | 0.11  | 0.05 | 0.05  | 0.19 |
| serine                                                                     | GC/MS     | Amino acid             | Glycine, serine and threonine metabolism                     | 0.68 | 0.88 | 0.9  | 0.68 | 0.58 | 0.46 | 0.5  | 0.52 | 0.59 | 0.78 | 0.6  | 0.61 | 0.67  | 0.65 | 0.82  | 0.73 |
| sorbitol                                                                   | GC/MS     | Carbohydrate           | Fructose, mannose, galactose, starch, and sucrose metabolism | 2.44 | 1.38 | 1.72 | 1.63 | 1.27 | 0.94 | 0.63 | 1    | 3.64 | 5.46 | 3.86 | 4.17 | 10.13 | 6.49 | 10.62 | 5.22 |
| sphingosine                                                                | LC/MS Pos | Lipid                  | Sphingolipid                                                 | 3.63 | 0.31 | 4.22 | 0.31 | 1.4  | 0.31 | 0.86 | 0.31 | 1.63 | 2.78 | 2.23 | 0.31 | 1.67  | 0.31 | 0.31  | 0.31 |
| streptomycin                                                               | LC/MS Pos | Xenobiotics            | Drug                                                         | 1.38 | 1.41 | 0.47 | 0.47 | 0.52 | 1.69 | 0.47 | 0.61 | 0.83 | 0.47 | 0.47 | 0.99 | 0.61  | 1    | 1.29  | 1.23 |
| taurine                                                                    | GC/MS     | Amino acid             | Cysteine, methionine, SAM, taurine metabolism                | 0.73 | 0.7  | 1.01 | 0.96 | 0.43 | 0.   |      |      |      |      |      |      |       |      |       |      |
