# Supplementary material
Source: PubMed Central journal article supplement (PMC4873412)
Supplement: NIHMS755847-supplement-4.pdf [file NIHMS755847-supplement-4.pdf]

Supplementary Table 3. Differential gene response of RCC4 VHL-deficient and –restored cells upon cystine deprivation

| Probesets   | Gene Symbol     | Gene Title                                                                                              | Puro+C4 | Puro+C3 | Puro+C2 | Puro-C4 | Puro-C3 | Puro-C1 | VHL+C4 | VHL+C3 | VHL+C1 | VHL-C4 | VHL-C3 | VHL-C2 | log2 Mean | p_value | Indicator |
|-------------|-----------------|---------------------------------------------------------------------------------------------------------|---------|---------|---------|---------|---------|---------|--------|--------|--------|--------|--------|--------|-----------|---------|-----------|
| 206029_at   | ANKRD1          | ankyrin repeat domain 1 (cardiac muscle)                                                                | 0.014   | -0.094  | 0.080   | 0.539   | 0.553   | 0.158   | -0.582 | -0.772 | -0.366 | 0.068  | -0.177 | -0.178 | 0.417     | 0.137   | 1         |
| 207219_at   | ZNF643          | zinc finger protein 643                                                                                 | -0.059  | 0.093   | -0.034  | 0.674   | 0.959   | 0.637   | -0.622 | -0.715 | -0.817 | -0.269 | -0.102 | -0.245 | 0.757     | 0.006   | 1         |
| 213804_at   | INPP5B          | inositol polyphosphate-5-phosphatase, 75kDa                                                             | 0.027   | 0.028   | -0.054  | 0.539   | 0.533   | 0.346   | -0.451 | -0.543 | -0.558 | -0.070 | -0.299 | -0.084 | 0.473     | 0.006   | 1         |
| 221865_at   | C9orf91         | chromosome 9 open reading frame 91                                                                      | 0.042   | 0.048   | -0.090  | 0.717   | 0.738   | 0.680   | -0.926 | -1.037 | -1.016 | -0.072 | -0.180 | -0.192 | 0.711     | 0.002   | 1         |
| 204411_at   | KIF21B          | kinesin family member 21B                                                                               | -0.092  | -0.050  | 0.142   | 0.791   | 0.696   | 0.625   | -0.967 | -1.089 | -1.005 | -0.237 | -0.242 | -0.240 | 0.816     | 0.002   | 1         |
| 208892_s_at | DUSP6           | dual specificity phosphatase 6                                                                          | -0.135  | 0.006   | 0.129   | 0.477   | 0.642   | 0.555   | -0.452 | -0.908 | -0.691 | -0.302 | 0.062  | 0.190  | 0.558     | 0.014   | 1         |
| 200802_at   | SARS            | seryl-tRNA synthetase                                                                                   | -0.002  | -0.023  | 0.025   | 0.587   | 0.671   | 0.625   | -0.639 | -0.638 | -0.561 | 0.079  | 0.064  | 0.020  | 0.628     | 0.003   | 1         |
| 205944_s_at | CLTCL1          | clathrin, heavy chain-like 1                                                                            | 0.029   | -0.076  | 0.047   | 0.665   | 0.887   | 0.874   | -0.624 | -0.714 | -0.542 | 0.007  | 0.031  | 0.078  | 0.809     | 0.014   | 1         |
| 202672_s_at | ATF3            | activating transcription factor 3                                                                       | 0.030   | -0.006  | -0.024  | 0.863   | 0.807   | 0.796   | -1.332 | -1.355 | -1.498 | 0.353  | 0.109  | 0.103  | 0.822     | 0.000   | 1         |
| 204286_s_at | PMAIP1          | phorbol-12-myristate-13-acetate-induced protein 1                                                       | -0.152  | 0.147   | 0.005   | 0.579   | 0.744   | 0.763   | -0.644 | -0.922 | -0.836 | 0.144  | 0.236  | 0.193  | 0.695     | 0.005   | 1         |
| 204285_s_at | PMAIP1          | phorbol-12-myristate-13-acetate-induced protein 1                                                       | 0.027   | -0.086  | 0.060   | 0.728   | 0.612   | 0.675   | -0.803 | -1.118 | -0.952 | 0.325  | 0.172  | 0.122  | 0.672     | 0.002   | 1         |
| 202014_at   | PPP1R15A        | protein phosphatase 1, regulatory (inhibitor) subunit 15A                                               | -0.031  | -0.121  | 0.152   | 0.695   | 0.674   | 0.679   | -0.729 | -0.876 | -0.751 | 0.292  | 0.159  | 0.161  | 0.683     | 0.014   | 1         |
| 37028_at    | PPP1R15A        | protein phosphatase 1, regulatory (inhibitor) subunit 15A                                               | -0.051  | -0.067  | 0.118   | 0.619   | 0.655   | 0.530   | -0.796 | -0.884 | -0.746 | 0.272  | 0.155  | 0.177  | 0.601     | 0.024   | 1         |
| 220892_s_at | PSAT1           | phosphoserine aminotransferase 1                                                                        | 0.018   | 0.085   | -0.104  | 0.699   | 0.621   | 1.017   | -0.355 | -0.281 | -0.267 | 0.663  | 0.540  | 0.480  | 0.779     | 0.047   | 1         |
| 203204_s_at | JMJD2A          | jumonji domain containing 2A                                                                            | 0.178   | -0.138  | -0.041  | 0.641   | 0.623   | 0.752   | -0.376 | -0.239 | -0.099 | 0.278  | 0.199  | 0.238  | 0.672     | 0.024   | 1         |
| 207629_s_at | ARHGEF2         | rho/rac guanine nucleotide exchange factor (GEF) 2                                                      | -0.059  | -0.082  | 0.142   | 0.364   | 0.624   | 0.522   | -0.211 | -0.358 | -0.109 | 0.235  | 0.229  | 0.241  | 0.503     | 0.039   | 1         |
| 208813_at   | GOT1            | glutamic-oxaloacetic transaminase 1, soluble (aspartate aminotransferase 1)                             | 0.032   | -0.026  | -0.006  | 0.800   | 0.949   | 0.909   | -0.274 | -0.161 | -0.150 | 0.359  | 0.457  | 0.336  | 0.886     | 0.005   | 1         |
| 213671_s_at | MARS            | methionine-tRNA synthetase                                                                              | -0.027  | 0.025   | 0.002   | 0.388   | 0.610   | 0.554   | -0.171 | -0.166 | -0.227 | 0.165  | 0.318  | 0.164  | 0.517     | 0.010   | 1         |
| 203205_at   | JMJD2A          | jumonji domain containing 2A                                                                            | 0.017   | -0.090  | 0.073   | 0.569   | 0.315   | 0.580   | -0.178 | -0.240 | -0.260 | 0.196  | 0.215  | 0.269  | 0.488     | 0.008   | 1         |
| 221778_at   | KIAA1718        | KIAA1718 protein                                                                                        | 0.018   | -0.135  | 0.117   | 1.037   | 0.815   | 0.806   | -0.123 | -0.498 | -0.549 | 0.367  | 0.304  | 0.371  | 0.886     | 0.013   | 1         |
| 204203_at   | CEBPB           | CCAAT/enhancer binding protein (C/EBP), gamma                                                           | 0.040   | -0.036  | -0.004  | 0.717   | 0.666   | 0.773   | -0.307 | -0.501 | -0.375 | 0.443  | 0.529  | 0.437  | 0.719     | 0.002   | 1         |
| 209435_s_at | ARHGEF2         | rho/rac guanine nucleotide exchange factor (GEF) 2                                                      | -0.034  | -0.031  | 0.065   | 0.604   | 0.602   | 0.530   | -0.296 | -0.387 | -0.221 | 0.280  | 0.335  | 0.332  | 0.579     | 0.009   | 1         |
| 219959_at   | PTHLH /// MOCOS | parathyroid hormone-like hormone /// molybdenum cofactor sulfurase                                      | 0.043   | -0.073  | 0.030   | 0.423   | 0.540   | 0.535   | -0.150 | -0.223 | -0.170 | 0.219  | 0.214  | 0.170  | 0.499     | 0.018   | 1         |
| 221050_s_at | GTPBP2          | GTP binding protein 2                                                                                   | 0.063   | -0.122  | 0.059   | 0.685   | 0.660   | 0.830   | -0.281 | -0.350 | -0.148 | 0.407  | 0.340  | 0.367  | 0.725     | 0.005   | 1         |
| 201475_x_at | MARS            | methionine-tRNA synthetase                                                                              | -0.030  | -0.046  | 0.076   | 0.545   | 0.527   | 0.619   | -0.274 | -0.287 | -0.163 | 0.308  | 0.283  | 0.266  | 0.564     | 0.000   | 1         |
| 209205_s_at | LMO4            | LIM domain only 4                                                                                       | -0.028  | -0.033  | 0.060   | 0.521   | 0.514   | 0.573   | -0.197 | -0.177 | -0.260 | 0.330  | 0.247  | 0.268  | 0.536     | 0.001   | 1         |
| 217996_at   | PHLDA1          | pleckstrin homology-like domain, family A, member 1                                                     | -0.170  | 0.025   | 0.145   | 0.581   | 0.509   | 0.503   | -0.050 | -0.358 | -0.274 | 0.056  | 0.216  | 0.242  | 0.531     | 0.044   | 1         |
| 202847_at   | PCK2            | phosphoenolpyruvate carboxykinase 2 (mitochondrial)                                                     | 0.028   | -0.067  | 0.039   | 1.256   | 1.282   | 1.383   | -1.283 | -1.326 | -1.253 | 0.721  | 0.846  | 0.584  | 1.307     | 0.001   | 1         |
| 218145_at   | TRIB3           | tribbles homolog 3 (Drosophila)                                                                         | 0.055   | -0.030  | -0.025  | 0.844   | 0.858   | 0.750   | -0.794 | -1.030 | -0.739 | 0.416  | 0.287  | 0.361  | 0.817     | 0.002   | 1         |
| 202402_s_at | CARS            | cysteineyl-tRNA synthetase                                                                              | 0.022   | -0.092  | 0.070   | 0.617   | 0.796   | 0.597   | -0.426 | -0.459 | -0.467 | 0.355  | 0.340  | 0.328  | 0.670     | 0.026   | 1         |
| 212971_at   | CARS            | cysteineyl-tRNA synthetase                                                                              | 0.013   | -0.055  | 0.042   | 0.576   | 0.652   | 0.477   | -0.481 | -0.486 | -0.426 | 0.323  | 0.283  | 0.245  | 0.568     | 0.019   | 1         |
| 217997_at   | PHLDA1          | pleckstrin homology-like domain, family A, member 1                                                     | -0.014  | -0.047  | 0.062   | 0.829   | 0.772   | 0.757   | -0.374 | -0.625 | -0.481 | 0.400  | 0.255  | 0.307  | 0.786     | 0.003   | 1         |
| 203438_at   | STC2            | stanniocalcin 2                                                                                         | -0.006  | -0.023  | 0.029   | 0.777   | 0.867   | 0.798   | -0.787 | -0.699 | -0.758 | 0.672  | 0.655  | 0.587  | 0.814     | 0.002   | 1         |
| 201761_at   | MTHFD2          | methylene tetrahydrofolate dehydrogenase (NADP+ dependent) 2, methylenetetrahydrofolate cyclohydrolyase | -0.024  | -0.026  | 0.050   | 0.636   | 0.647   | 0.672   | -0.543 | -0.726 | -0.637 | 0.603  | 0.698  | 0.650  | 0.652     | 0.001   | 1         |
| 212948_at   | CAMTA2          | calmodulin binding transcription activator 2                                                            | -0.029  | -0.063  | 0.092   | 0.611   | 0.560   | 0.424   | -0.325 | -0.576 | -0.412 | 0.465  | 0.567  | 0.397  | 0.532     | 0.034   | 1         |
| 215009_s_at | SEC31A          | SEC31 homolog A (S. cerevisiae)                                                                         | -0.104  | 0.215   | -0.111  | 0.494   | 0.511   | 0.557   | -0.088 | -0.270 | -0.271 | -0.204 | 0.108  | -0.003 | 0.520     | 0.045   | 1         |
| 203888_at   | THBD            | thrombomodulin                                                                                          | -0.035  | -0.186  | 0.221   | 0.644   | 0.676   | 0.515   | -0.399 | -0.445 | -0.299 | -0.023 | -0.036 | -0.123 | 0.612     | 0.068   | 1         |
| 203887_s_at | THBD            | thrombomodulin                                                                                          | -0.016  | -0.087  | 0.103   | 0.766   | 0.629   | 0.567   | -0.253 | -0.598 | -0.182 | 0.708  | -0.072 | -0.006 | 0.654     | 0.021   | 1         |
| 213763_at   | HIPK2           | Homeodomain interacting protein kinase 2                                                                | 0.385   | -0.020  | -0.365  | 0.612   | 0.743   | 0.438   | 0.051  | -0.034 | -0.038 | -0.106 | -0.286 | -0.199 | 0.597     | 0.084   | 1         |
| 202887_s_at | DDIT4           | DNA-damage-inducible transcript 4                                                                       | 0.029   | -0.015  | -0.015  | 1.279   | 1.262   | 1.222   | -2.873 | -2.967 | -2.974 | -0.639 | -0.706 | -0.681 | 1.254     | 0.000   | 1         |
| 202644_s_at | TNFAIP3         | tumor necrosis factor, alpha-induced protein 3                                                          | -0.108  | -0.024  | 0.132   | 0.658   | 0.527   | 0.428   | -1.186 | -1.588 | -1.507 | -0.114 | -0.594 | -0.622 | 0.538     | 0.058   | 1         |
| 204748_at   | PTGS2           | prostaglandin-endoperoxide synthase 2 (prostaglandin G/H synthase and cyclooxygenase)                   | 0.073   | 0.120   | -0.192  | 0.614   | 0.514   | 0.561   | -1.724 | -2.155 | -1.577 | -0.990 | -0.936 | 0.673  | 0.563     | 0.032   | 1         |
| 218651_s_at | LARP6           | La ribonucleoprotein domain family, member 6                                                            | -0.040  | -0.075  | 0.115   | 0.542   | 0.509   | 0.584   | -0.945 | -1.306 | -1.103 | -0.497 | -0.577 | -0.547 | 0.545     | 0.005   | 1         |
| 202859_x_at | IL8             | interleukin 8                                                                                           | -0.170  | -0.090  | 0.260   | 0.684   | 0.429   | 0.548   | -2.935 | -3.727 | -3.499 | -0.748 | -1.461 | -1.466 | 0.554     | 0.078   | 1         |
| 211506_s_at | IL8             | interleukin 8                                                                                           | -0.121  | -0.080  | 0.202   | 0.862   | 0.445   | 0.770   | -3.158 | -3.437 | -3.287 | -0.866 | -1.433 | -1.755 | 0.692     | 0.042   | 1         |
| 212486_s_at | FN1             | FN1 oncogene related to SRC, FGR, YES                                                                   | 0.075   | -0.009  | -0.066  | 0.646   | 0.285   | 0.587   | -0.734 | -0.817 | -0.931 | -0.792 | -0.787 | -0.765 | 0.506     | 0.043   | 1         |
| 206969_at   | KRT34           | keratin 34                                                                                              | -0.031  | -0.211  | 0.242   | 1.008   | 0.904   | 1.100   | -1.808 | -1.701 | -1.692 | -1.609 | -1.685 | -1.510 | 1.004     | 0.006   | 1         |
| 203665_at   | HMOX1           | heme oxygenase (decycling) 1                                                                            | -0.053  | -0.215  | 0.268   | 0.784   | 0.711   | 0.727   | -1.509 | -1.572 | -1.497 | -0.987 | -1.092 | -1.134 | 0.741     | 0.035   | 1         |
| 210105_s_at | FN1             | FN1 oncogene related to SRC, FGR, YES                                                                   | 0.042   | -0.053  | 0.012   | 0.615   | 0.602   | 0.541   | -2.505 | -2.400 | -2.382 | -1.778 | -1.944 | -1.558 | 0.586     | 0.004   | 1         |
| 211668_s_at | PLAU            | plasminogen activator, urokinase /// plasminogen activator, urokinase                                   | 0.026   | -0.075  | 0.048   | 0.521   | 0.358   | 0.553   | -2.353 | -2.658 | -2.178 | -1.727 | -2.021 | -1.805 | 0.478     | 0.002   | 1         |
| 205479_s_at | PLAU            | plasminogen activator, urokinase                                                                        | -0.057  | -0.061  | 0.118   | 0.524   | 0.519   | 0.456   | -2.121 | -2.469 | -1.960 | -1.579 | -1.829 | -1.705 | 0.500     | 0.025   | 1         |
| 221009_s_at | ANGPTL4         | angiopoietin-like 4                                                                                     | -0.059  | -0.186  | 0.245   | 0.618   | 0.591   | 0.560   | -1.459 | -1.797 | -1.463 | -1.434 | -1.729 | -1.741 | 0.590     | 0.052   | 1         |
| 221859_at   | SYT13           | synaptotagmin XIII                                                                                      | 0.441   | -0.073  | -0.368  | 0.500   | 0.577   | -0.127  | -1.846 | -1.837 | -1.586 | -1.924 | -1.784 | -1.846 | 0.316     | 0.212   | 1         |
| 209305_s_at | GADD45B         | growth arrest and DNA-damage-inducible, beta                                                            | 0.075   | -0.045  | -0.030  | 0.525   | 0.288   | 0.688   | -0.193 | -0.129 | -0.094 | 1.073  | 0.958  | 0.711  | 0.501     | 0.048   | 1         |
| 209383_at   | DDIT3           | DNA-damage-inducible transcript 3                                                                       | -0.089  | -0.028  | 0.118   | 0.994   | 0.924   | 0.882   | -0.417 | -0.443 | -0.393 | 1.196  | 1.081  | 1.077  | 0.934     | 0.010   | 1         |
| 203725_at   | GADD45A         | growth arrest and DNA-damage-inducible, alpha                                                           | -0.056  | 0.037   | 0.020   | 0.448   | 0.493   | 0.501   | -0.046 | -0.303 | -0.336 | 0.762  | 0.793  | 0.755  | 0.514     | 0.008   | 1         |
| 206101_at   | ECM2            | extracellular matrix protein 2, female organ and adipocyte specific                                     | -0.105  | 0.083   | 0.022   | 0.690   | 0.656   | 0.435   | 0.253  | 0.098  | -0.027 | 1.422  | 1.199  | 1.366  | 0.594     | 0.033   | 1         |
| 203439_s_at | STC2            | stanniocalcin 2                                                                                         | 0.029   | 0.008   | -0.037  | 1.013   | 0.969   | 0.845   | -0.071 | -0.048 | -0.048 | 1.323  | 1.282  | 1.283  | 0.942     | 0.001   | 1         |
| 210587_at   | INHBE           | inhibin, beta E                                                                                         | -0.009  | 0.030   | -0.022  | 1.768   | 1.625   | 1.750   | -0.057 | 0.003  | -0.170 | 2.544  | 2.465  | 2.285  | 1.715     | 0.001   | 1         |
| 207574_s_at | GADD45B         | growth arrest and DNA-damage-inducible, beta                                                            | -0.002  | -0.032  | 0.034   | 0.617   | 0.588   | 0.710   | -0.035 | -0.048 | -0.013 | 0.999  | 0.915  | 0.891  | 0.638     | 0.001   | 1         |
| 209304_x_at | GADD45B         | growth arrest and DNA-damage-inducible, beta                                                            | 0.034   | -0.057  | 0.023   | 0.585   | 0.494   | 0.579   | -0.099 | -0.031 | 0.005  | 0.977  | 0.819  | 0.756  | 0.553     | 0.000   | 1         |
| 206085_s_at | CTH             | cystathionase (cystathionine gamma-lyase)                                                               | -0.117  | 0.065   | 0.053   | 1.630   | 1.581   | 1.496   | 0.240  | 0.038  | 0.129  | 1.920  | 1.919  | 1.673  | 1.569     | 0.003   | 1         |
| 221841_s_at | KLF4            | Kruppel-like factor 4 (gut)                                                                             | -0.175  | 0.041   | 0.133   | 1.351   | 1.138   | 1.403   | 0.432  | 0.034  | 0.163  | 1.818  | 1.772  | 1.731  | 1.297     | 0.009   | 1         |
| 200924_s_at | SLC3A2          | solute carrier family 3 (activators of dibasic and neutral amino acid transport), member 2              | 0.036   | -0.030  | -0.006  | 0.574   | 0.733   | 0.613   | 0.038  | 0.016  | -0.047 | 0.622  | 0.596  | 0.627  | 0.640     | 0.010   | 1         |
| 205047_s_at | ASNS            | asparagine synthetase                                                                                   | -0.020  | 0.000   | 0.020   | 1.422   | 1.473   |         |        |        |        |        |        |        |           |         |           |

|             |                   |                                                                                                                 |        |        |        |        |        |        |        |        |        |        |        |        |        |       |    |
|-------------|-------------------|-----------------------------------------------------------------------------------------------------------------|--------|--------|--------|--------|--------|--------|--------|--------|--------|--------|--------|--------|--------|-------|----|
| 219284_at   | HSPBP1            | HSPB (heat shock 27kDa) associated protein 1                                                                    | -0.109 | 0.087  | 0.022  | 0.758  | 0.687  | 0.727  | 0.187  | 0.353  | 0.073  | 0.649  | 0.730  | 0.736  | 0.724  | 0.011 | 1  |
| 200670_at   | XBP1              | X-box binding protein 1                                                                                         | -0.098 | 0.083  | 0.015  | 0.785  | 0.828  | 0.907  | 0.126  | 0.137  | -0.033 | 0.532  | 0.759  | 0.807  | 0.840  | 0.003 | 1  |
| 202720_at   | TES               | testis derived transcript (3 LIM domains)                                                                       | -0.056 | 0.027  | -0.029 | 0.488  | 0.527  | 0.547  | 0.337  | 0.160  | -0.001 | 0.278  | 0.416  | 0.451  | 0.521  | 0.001 | 1  |
| 205194_at   | PSPH              | phosphoserine phosphatase                                                                                       | -0.074 | 0.360  | -0.286 | 1.096  | 1.154  | 1.117  | 1.071  | 1.012  | 0.896  | 1.150  | 1.939  | 1.928  | 1.122  | 0.024 | 1  |
| 201000_at   | AARS              | alanyl-tRNA synthetase                                                                                          | 0.047  | -0.034 | -0.013 | 0.435  | 0.542  | 0.517  | 0.484  | 0.588  | 0.636  | 1.146  | 1.069  | 1.077  | 0.498  | 0.013 | 1  |
| 221577_x_at | GDF15             | growth differentiation factor 15                                                                                | -0.064 | -0.031 | 0.094  | 1.076  | 1.013  | 1.157  | 1.371  | 1.255  | 1.307  | 2.219  | 2.251  | 2.222  | 1.082  | 0.001 | 1  |
| 208763_s_at | TSC2D3            | TSC22 domain family, member 3                                                                                   | 0.020  | 0.022  | -0.042 | 0.490  | 0.612  | 0.637  | 0.246  | 0.341  | 0.358  | 1.078  | 1.210  | 1.230  | 0.580  | 0.011 | 1  |
| 209230_s_at | NUPR1             | nuclear protein 1                                                                                               | 0.014  | -0.029 | 0.015  | 0.905  | 0.943  | 1.020  | 0.152  | 0.279  | 0.322  | 1.493  | 1.568  | 1.465  | 0.956  | 0.001 | 1  |
| 210817_s_at | CALCOCO2          | calcium binding and coiled-coil domain 2                                                                        | 0.058  | -0.017 | -0.042 | 0.530  | 0.564  | 0.604  | 0.253  | 0.292  | 0.257  | 0.732  | 0.784  | 0.599  | 0.566  | 0.008 | 1  |
| 206343_s_at | NRG1              | neuregulin 1                                                                                                    | 0.000  | -0.053 | 0.053  | 0.516  | 0.516  | 0.618  | 0.153  | 0.216  | 0.167  | 0.716  | 0.714  | 0.641  | 0.550  | 0.001 | 1  |
| 202638_s_at | ICAM1             | intercellular adhesion molecule 1 (CD54), human rhinovirus receptor                                             | 0.028  | -0.196 | 0.168  | 0.623  | 0.491  | 0.517  | 0.383  | 0.249  | 0.355  | 1.058  | 0.805  | 0.869  | 0.543  | 0.033 | 1  |
| 201294_s_at | WSB1              | WD repeat and SOCS box-containing 1                                                                             | 0.511  | -0.440 | -0.071 | 0.570  | 0.868  | 0.530  | 0.285  | 0.254  | 0.293  | 0.398  | 0.710  | 0.419  | 0.656  | 0.211 | 1  |
| 202481_at   | DHRS3             | dehydrogenase/reductase (SDR family) member 3                                                                   | -0.078 | 0.003  | 0.074  | 0.502  | 0.036  | 0.619  | 1.279  | 1.222  | 1.220  | 1.534  | 1.713  | 1.453  | 0.385  | 0.161 | 1  |
| 204439_at   | IFI44L            | interferon-induced protein 44-like                                                                              | -0.051 | -0.089 | 0.140  | 0.624  | 0.420  | 0.567  | 1.774  | 1.539  | 1.575  | 1.616  | 1.942  | 1.885  | 0.537  | 0.018 | 1  |
| 214701_s_at | FN1               | fibronectin 1                                                                                                   | 0.529  | -0.537 | 0.008  | 0.020  | -0.085 | -0.095 | 1.008  | 0.999  | 1.036  | 1.276  | 1.142  | 1.086  | -0.053 | 0.866 | -1 |
| 210150_s_at | LAMA5             | laminin, alpha 5                                                                                                | -0.106 | -0.030 | 0.136  | -0.005 | -0.592 | -0.588 | 2.647  | 2.621  | 2.269  | 2.482  | 2.503  | 2.538  | -0.395 | 0.258 | -1 |
| 218711_s_at | SDPR              | serum deprivation response (phosphatidylserine binding protein)                                                 | 0.090  | 0.179  | -0.268 | -0.481 | -0.563 | -0.644 | 3.061  | 3.274  | 3.204  | 2.381  | 2.994  | 2.923  | -0.563 | 0.033 | -1 |
| 202437_s_at | CYP1B1            | cytochrome P450, family 1, subfamily B, polypeptide 1                                                           | -0.165 | 0.396  | -0.230 | -0.760 | -0.570 | -0.626 | 2.995  | 2.909  | 2.736  | 2.122  | 2.514  | 2.484  | -0.652 | 0.060 | -1 |
| 209446_s_at | C7orf44           | chromosome 7 open reading frame 44                                                                              | -0.165 | -0.348 | 0.513  | -0.501 | -0.394 | -0.424 | -0.356 | -0.572 | -0.502 | -0.738 | -0.356 | -0.337 | -0.440 | 0.236 | -1 |
| 201996_s_at | SPEN              | spen homolog, transcriptional regulator (Drosophila)                                                            | -0.061 | -0.114 | 0.175  | -0.671 | -0.817 | -0.794 | -0.138 | -0.545 | -0.308 | -0.361 | -0.627 | -0.614 | -0.760 | 0.019 | -1 |
| 200664_s_at | DNAJB1            | DnaJ (Hsp40) homolog, subfamily B, member 1                                                                     | 0.075  | -0.060 | -0.015 | -0.525 | -0.560 | -0.343 | -0.198 | -0.341 | -0.212 | -0.876 | -0.962 | -0.987 | -0.476 | 0.027 | -1 |
| 202388_at   | RGS2              | regulator of G-protein signalling 2, 24kDa                                                                      | 0.051  | -0.208 | 0.158  | -0.371 | -0.641 | -0.502 | -0.187 | -0.592 | -0.193 | -1.474 | -1.673 | -1.613 | -0.505 | 0.023 | -1 |
| 200800_s_at | HSPA1A /// HSPA1B | heat shock 70kDa protein 1A /// heat shock 70kDa protein 1B                                                     | 0.096  | -0.067 | -0.029 | -0.841 | -0.732 | -0.709 | -0.543 | -0.519 | -0.414 | -1.997 | -2.140 | -2.168 | -0.761 | 0.013 | -1 |
| 202581_at   | HSPA1B            | heat shock 70kDa protein 1B                                                                                     | -0.012 | 0.037  | -0.025 | -0.772 | -0.865 | -0.855 | -0.470 | -0.631 | -0.615 | -2.450 | -2.443 | -2.205 | -0.831 | 0.002 | -1 |
| 200799_at   | HSPA1A            | heat shock 70kDa protein 1A                                                                                     | -0.134 | 0.048  | 0.086  | -0.609 | -0.630 | -0.522 | -0.110 | -0.177 | -0.216 | -1.571 | -1.501 | -1.552 | -0.587 | 0.010 | -1 |
| 214329_x_at | TNFSF10           | tumor necrosis factor (ligand) superfamily, member 10 /// tumor necrosis factor (ligand) superfamily, member 10 | -0.150 | 0.260  | -0.110 | -0.656 | -0.646 | -0.645 | 0.104  | -0.152 | -0.622 | -1.288 | -0.983 | -1.156 | -0.649 | 0.037 | -1 |
| 215073_s_at | NR2F2             | nuclear receptor subfamily 2, group F, member 2                                                                 | -0.025 | 0.289  | -0.264 | -0.594 | -0.394 | -0.569 | -0.389 | -0.342 | -0.635 | -1.884 | -1.066 | -1.149 | -0.519 | 0.043 | -1 |
| 214724_at   | DIXDC1            | DIX domain containing 1                                                                                         | 0.108  | 0.041  | -0.149 | -0.671 | -0.564 | -0.585 | 0.020  | -0.166 | -0.188 | -0.577 | -0.468 | -0.535 | -0.606 | 0.026 | -1 |
| 212099_at   | RHOB              | ras homolog gene family, member B                                                                               | 0.010  | 0.055  | -0.065 | -0.681 | -0.503 | -0.543 | -0.106 | -0.102 | -0.040 | -1.018 | -0.894 | -0.864 | -0.576 | 0.011 | -1 |
| 218566_s_at | CHORDC1           | cysteine and histidine-rich domain (CHORD)-containing 1                                                         | -0.102 | 0.186  | -0.085 | -0.625 | -0.602 | -0.515 | 0.161  | 0.055  | -0.031 | -0.783 | -0.771 | -0.753 | -0.581 | 0.032 | -1 |
| 219062_s_at | ZCCHC2            | zinc finger, CCHC domain containing 2                                                                           | -0.006 | -0.066 | 0.072  | -0.525 | -0.660 | -0.497 | 0.229  | 0.041  | 0.110  | -0.502 | -0.554 | -0.441 | -0.561 | 0.002 | -1 |
| 206928_at   | ZNF124            | zinc finger protein 124                                                                                         | -0.311 | 0.244  | 0.067  | -0.557 | -0.628 | -0.423 | 0.129  | -0.105 | 0.007  | -0.115 | -0.119 | -0.154 | -0.536 | 0.099 | -1 |
| 213268_at   | CAMTA1            | calmodulin binding transcription activator 1                                                                    | -0.052 | -0.075 | 0.127  | -0.569 | -0.665 | -0.712 | 0.666  | 0.252  | 0.561  | -0.307 | -0.306 | -0.070 | -0.648 | 0.022 | -1 |
| 205818_at   | DBC1              | deleted in bladder cancer 1                                                                                     | 0.094  | 0.044  | -0.138 | -0.533 | -0.400 | -0.763 | 0.718  | 0.759  | 0.729  | 0.298  | 0.284  | 0.206  | -0.565 | 0.011 | -1 |
| 219250_s_at | FLRT3             | fibronectin leucine rich transmembrane protein 3                                                                | -0.025 | 0.242  | -0.217 | -0.632 | -0.435 | -0.538 | 0.349  | 0.708  | 0.266  | -0.315 | 0.191  | -0.050 | -0.535 | 0.039 | -1 |
| 218807_at   | VAV3              | vav 3 oncogene                                                                                                  | 0.055  | 0.153  | -0.208 | -0.742 | -0.507 | -0.494 | 0.184  | 0.566  | 0.267  | -0.158 | 0.168  | 0.126  | -0.581 | 0.063 | -1 |
