# Supplementary material
Source: PubMed Central journal article supplement (PMC4873412)

**Figure S1**

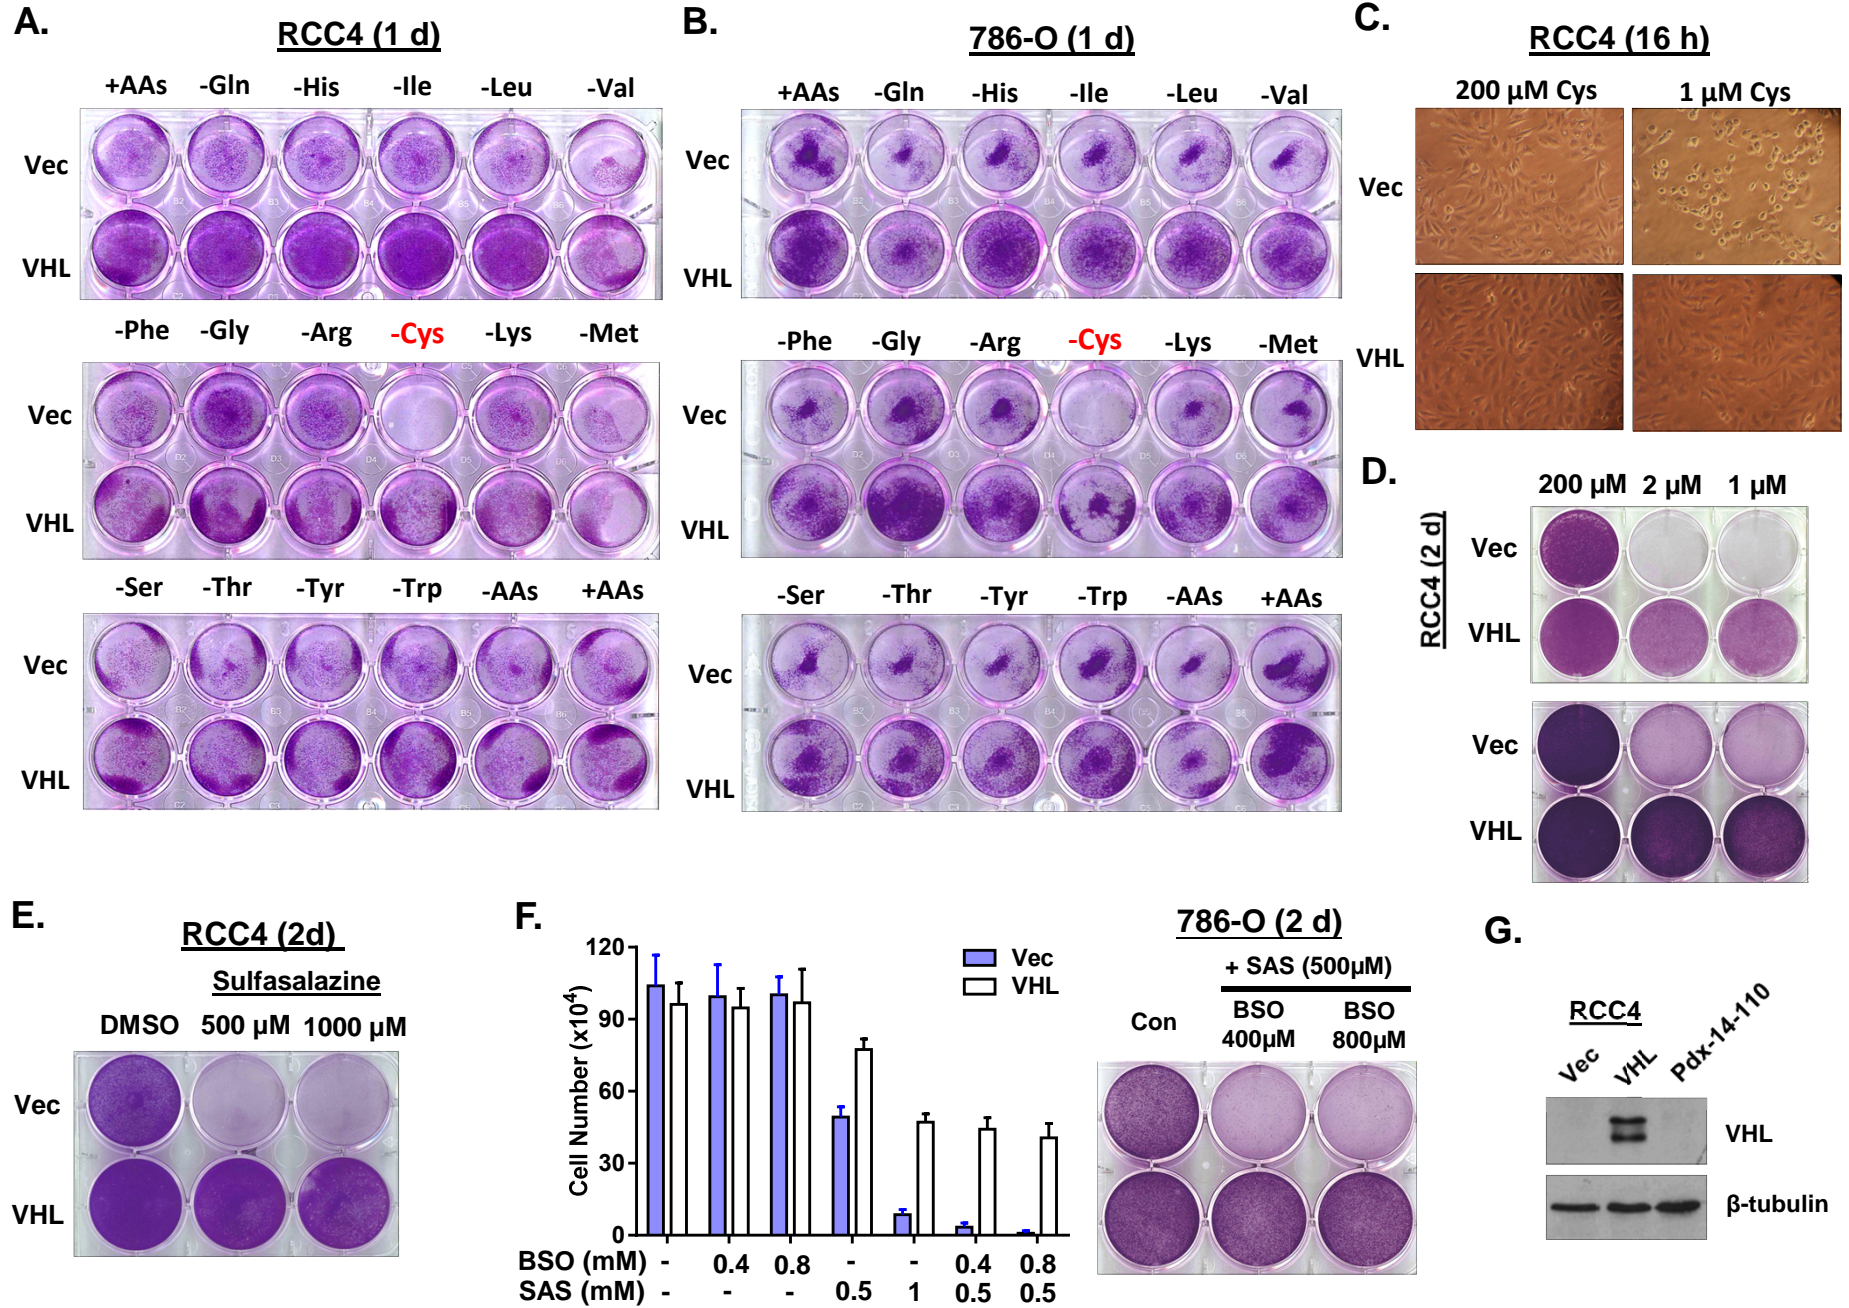

**Figure S2**

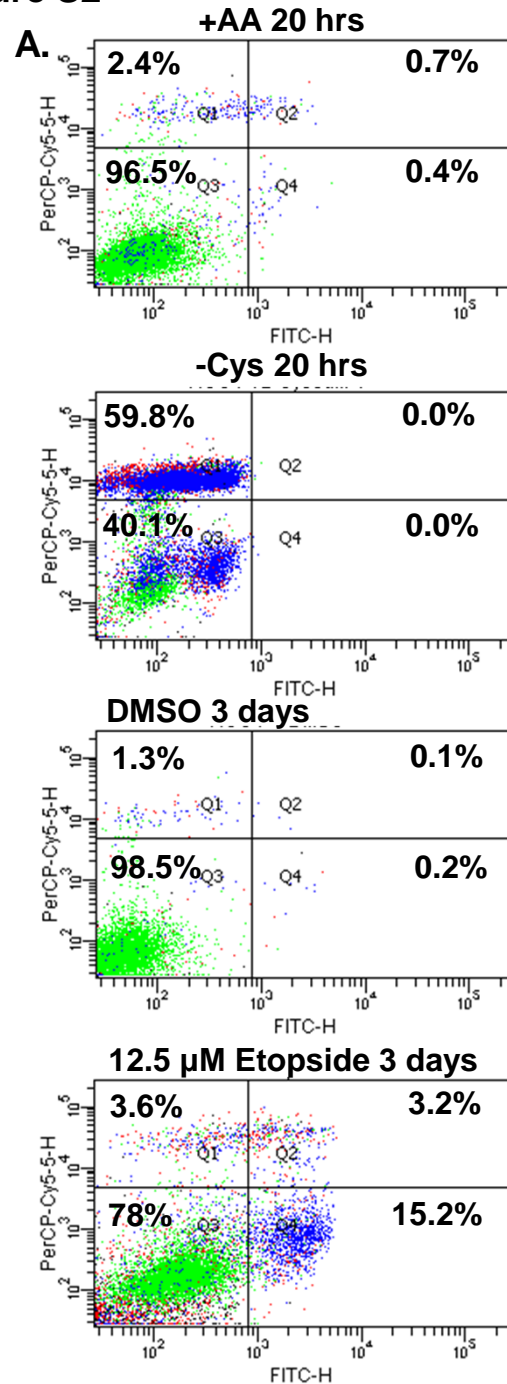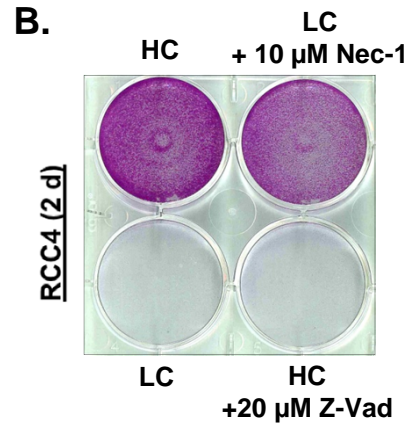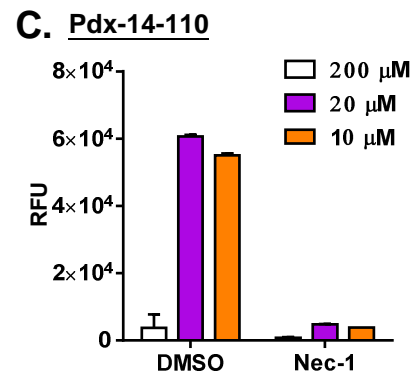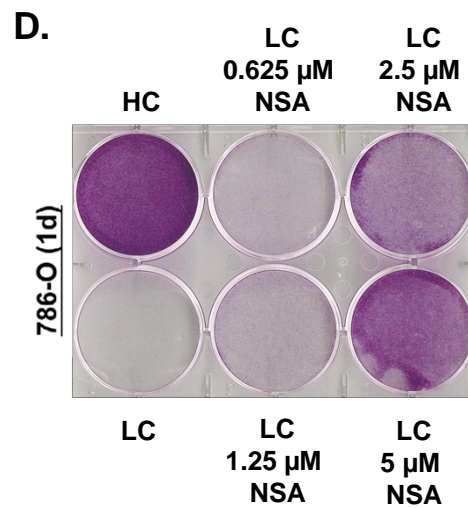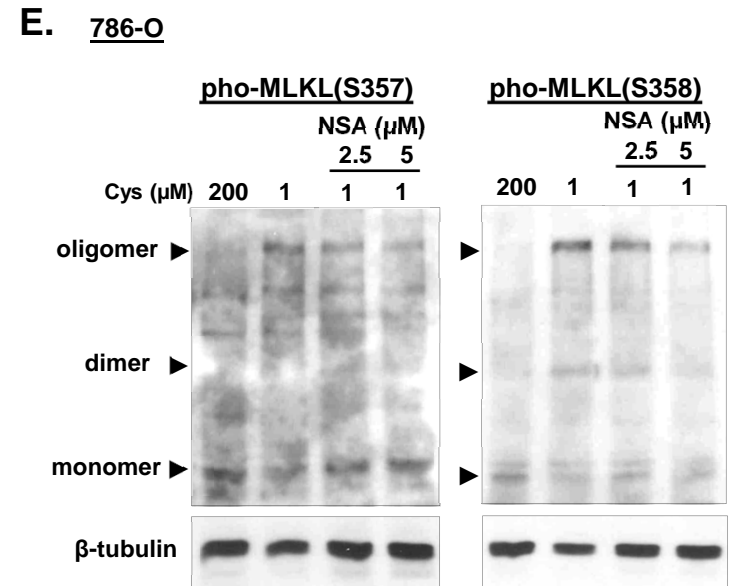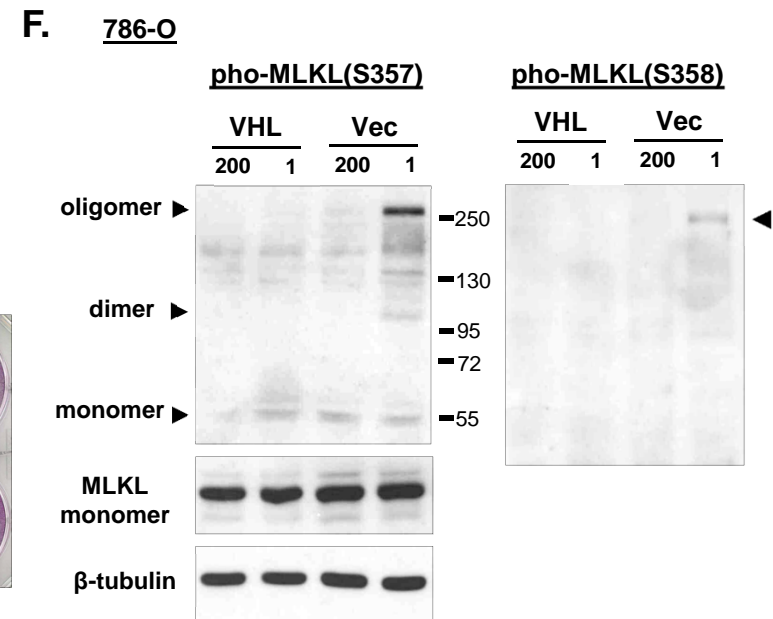

**Figure S3**

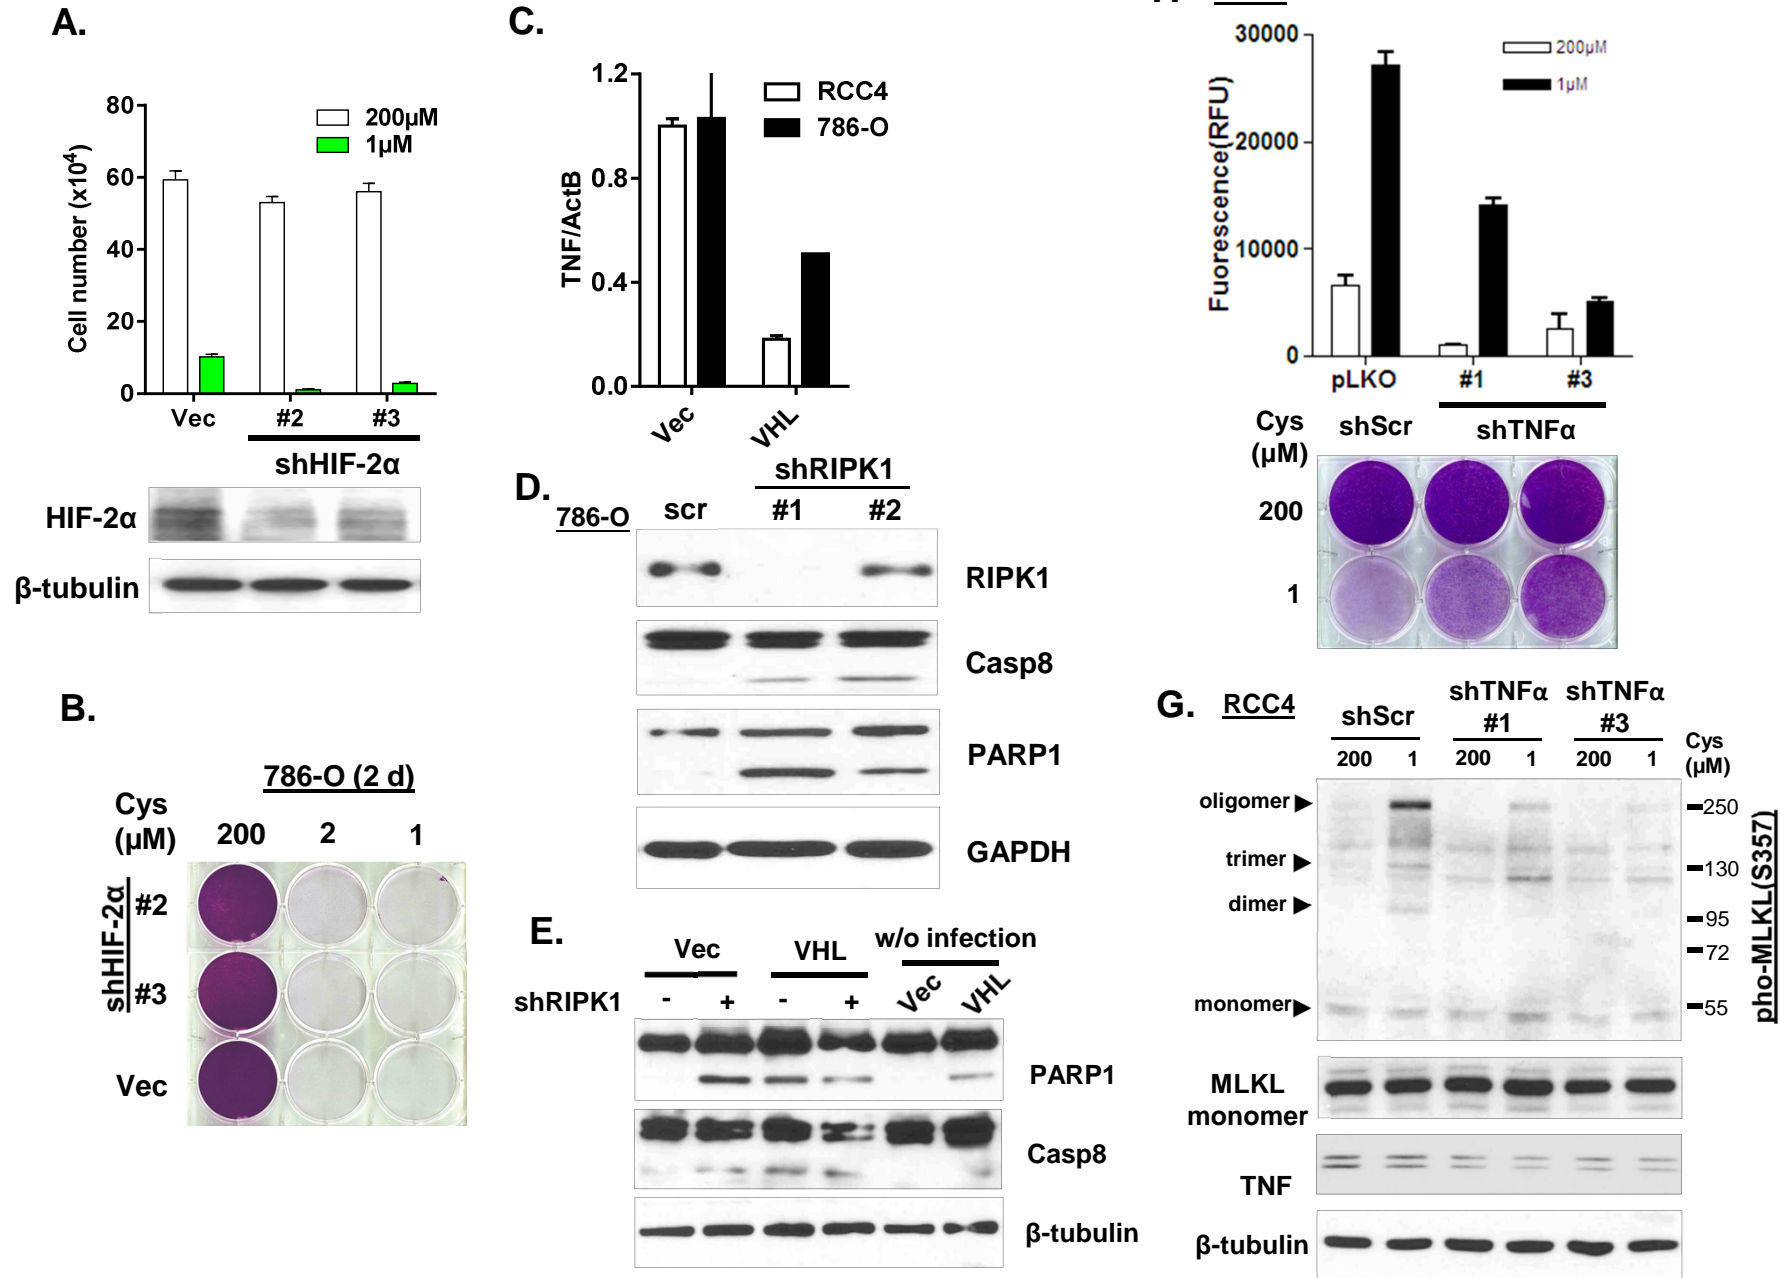

**Figure S4**

**A.**

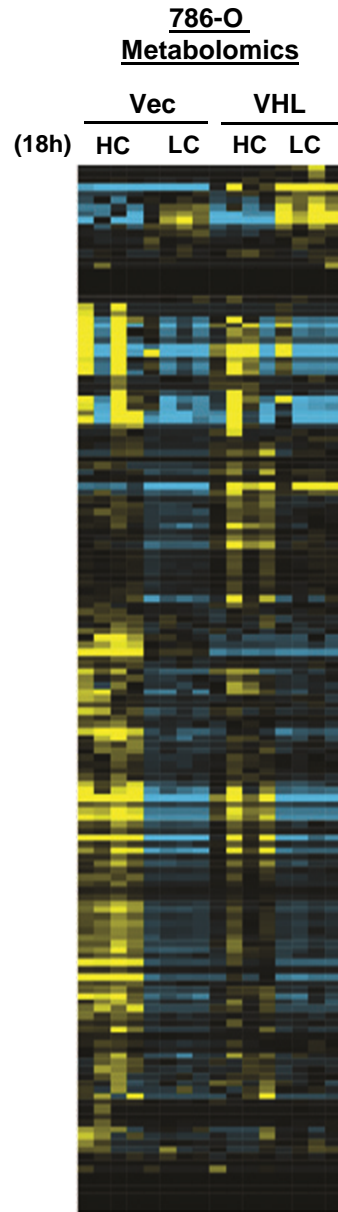

**B.**

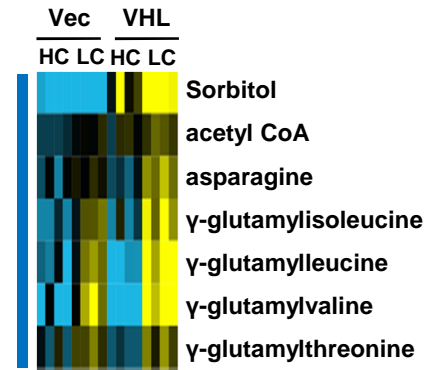

**C. RCC4**

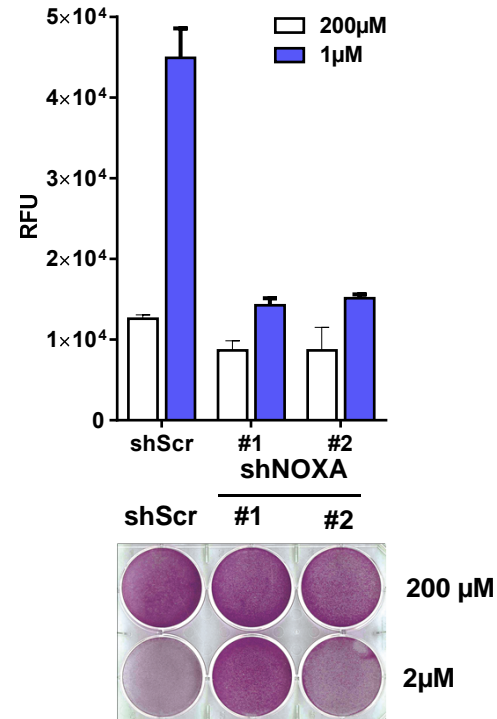

**D.**

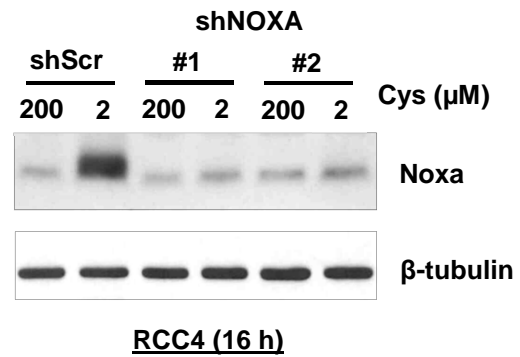

**Figure S5**

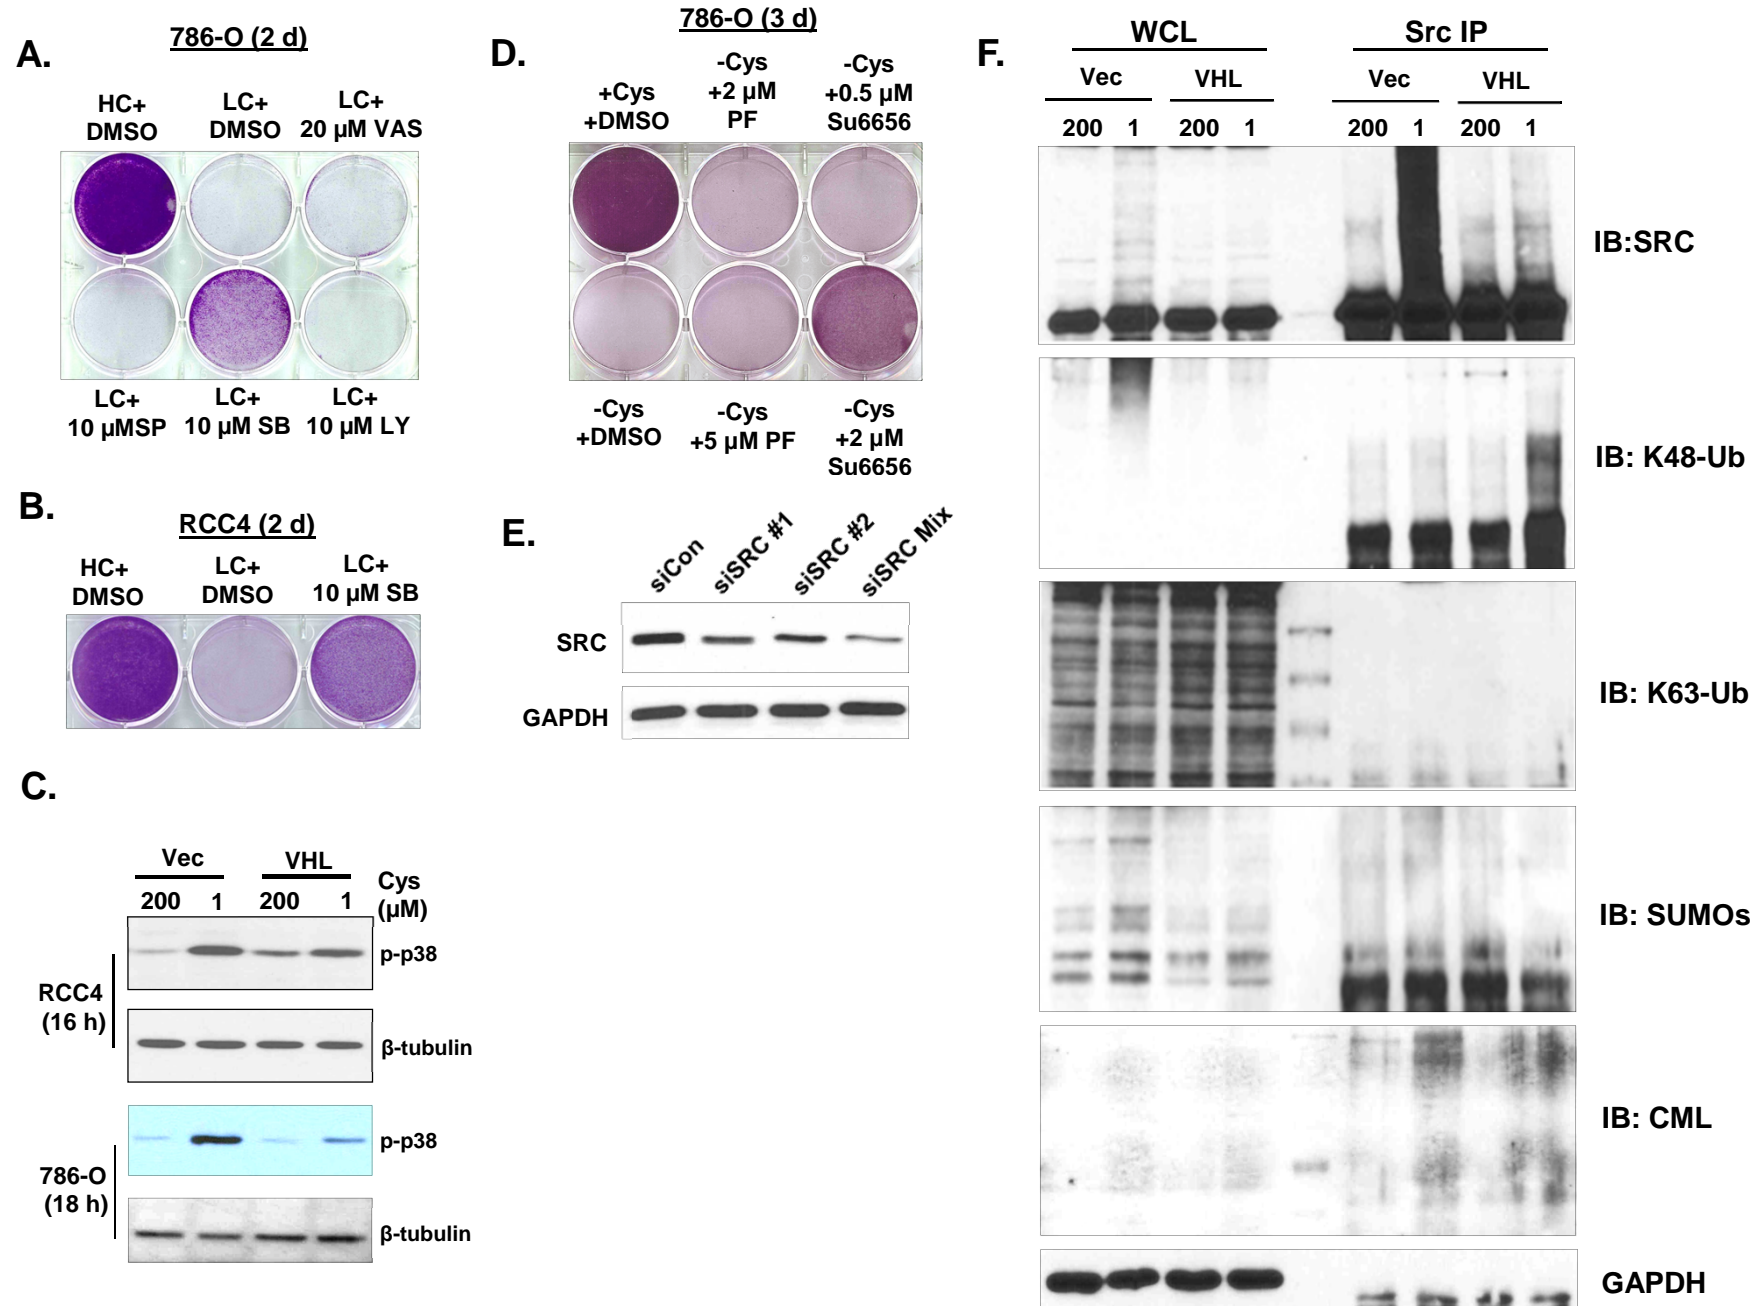

**Figure S6**

**A. 786-O**

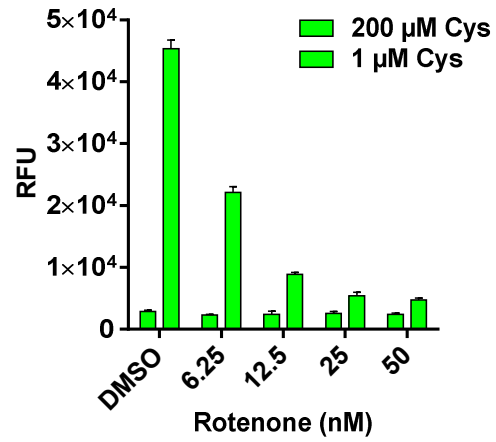

**B.**

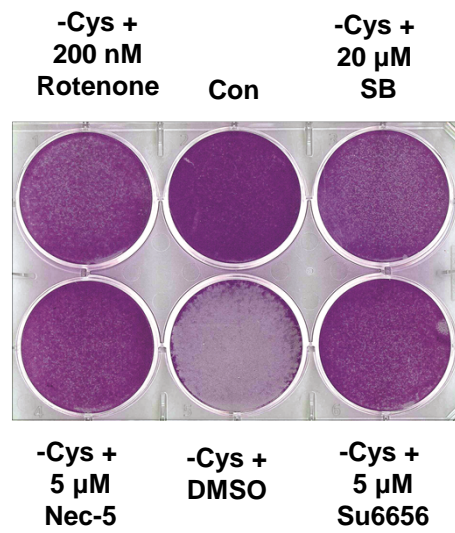

**C.**

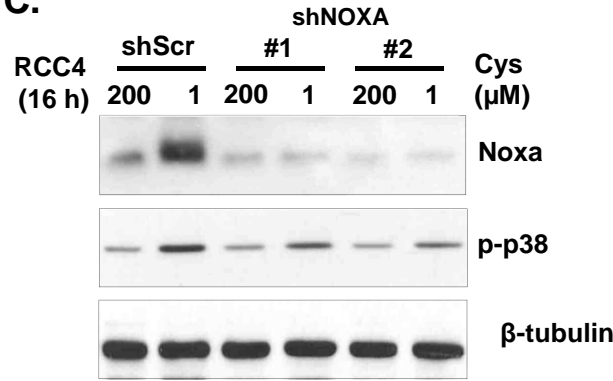

**D.**

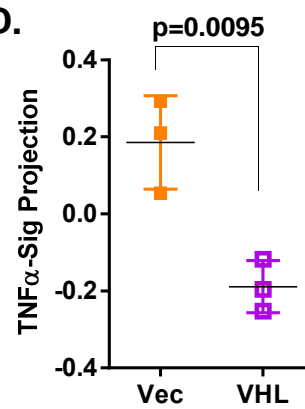

**E.**

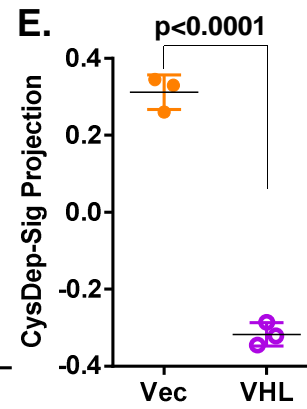

**F.**

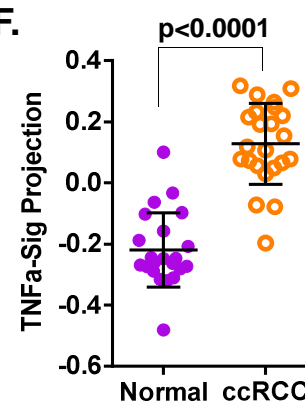

**G.**

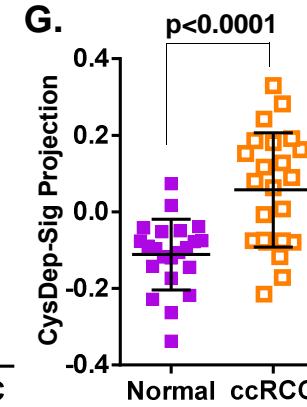

**H.**

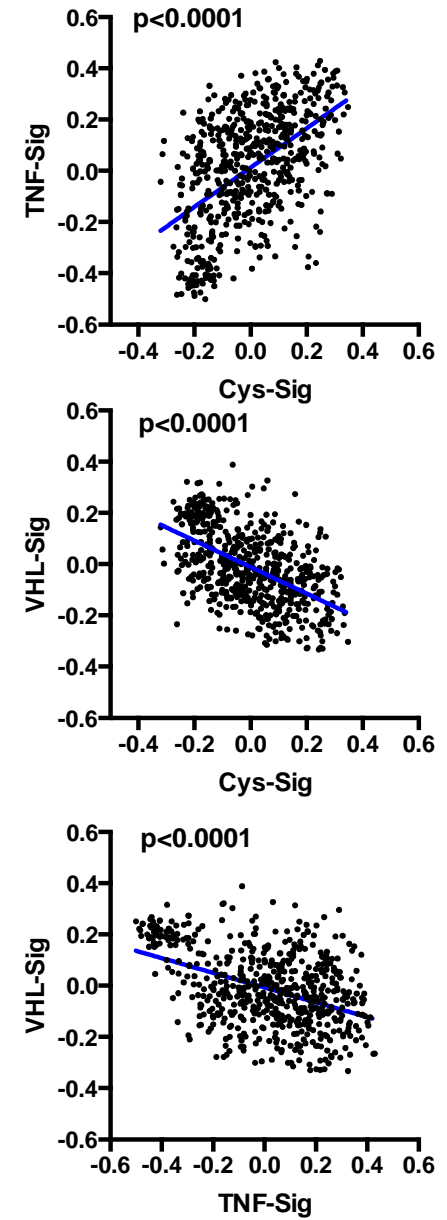

**Figure S7**

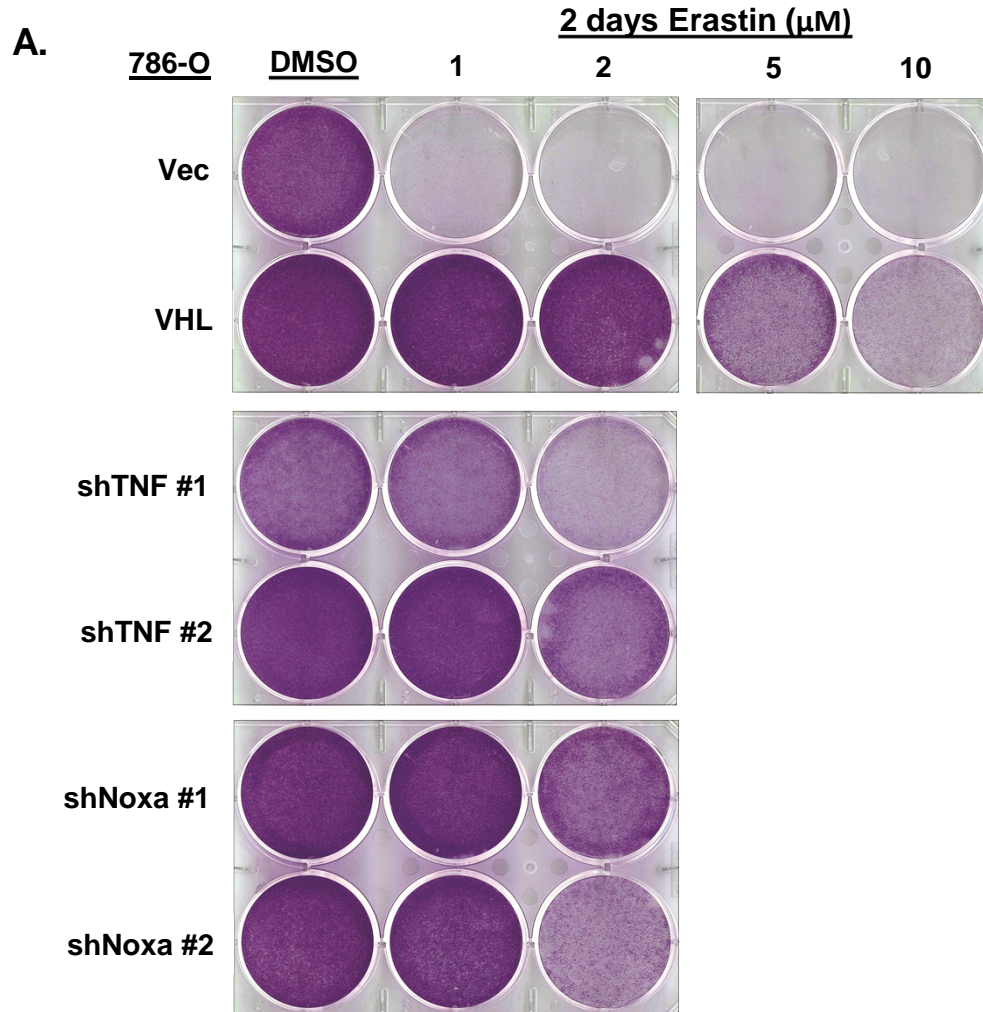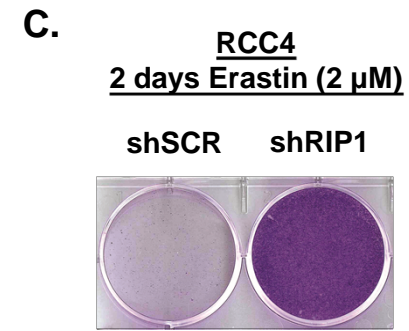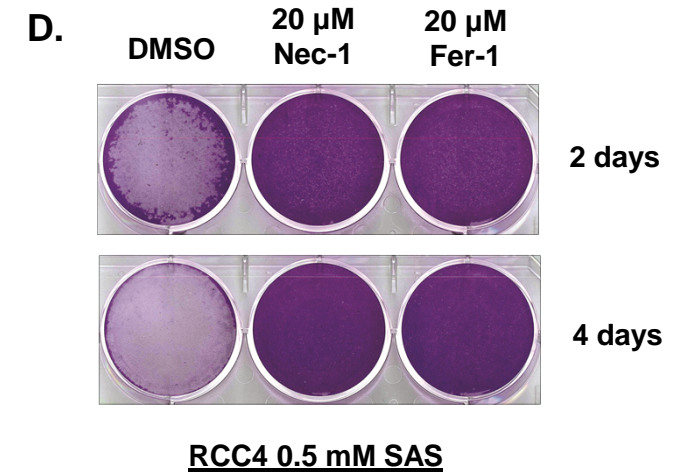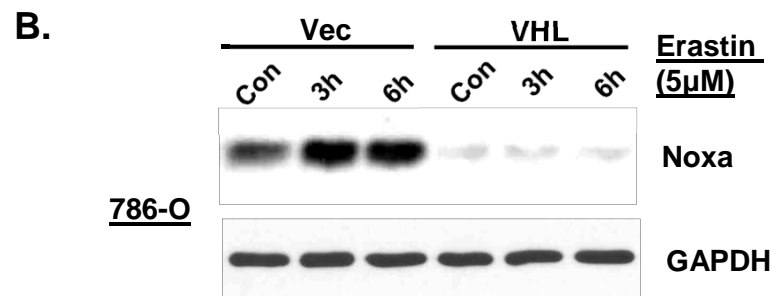

Supplement: NIHMS755847-supplement-1.pdf [file NIHMS755847-supplement-1.pdf]
